# Supplementary material for: High-throughput screen with the l,d-transpeptidase LdtMt2 of Mycobacterium tuberculosis reveals novel classes of covalently reacting inhibitors
Source: Royal Society of Chemistry journal article supplement (doi:10.1039/d2sc06858c), 2023-01-01
Supplement: d2sc06858c1.pdf [file d2sc06858c1.pdf]

1 **Supplementary information**

2

3 **High-Throughput Screen with the L,D-transpeptidase Ldt<sub>Mt2</sub> of *Mycobacterium tuberculosis***  
4 **Reveals Novel Classes of Covalent Inhibitors**

5 Mariska de Munnik<sup>1</sup>, Pauline A. Lang<sup>1</sup>, Francisco De Dios Anton<sup>2</sup>, Monica Cacho<sup>2</sup>, Robert Bates<sup>2</sup>, Jürgen  
6 Brem<sup>1,3</sup>, Beatriz Rodríguez Miquel<sup>2\*</sup> and Christopher J. Schofield<sup>1\*</sup>

7 <sup>1</sup> Chemistry Research Laboratory, Department of Chemistry and the Ineos Oxford Institute of  
8 Antimicrobial Research, University of Oxford, 12 Mansfield Road, Oxford, OX1 3TA, United Kingdom.

9 <sup>2</sup> Tres Cantos Medicines Development Campus GlaxoSmithKline, Calle Severo Ochoa 2, Tres Cantos,  
10 Madrid, Spain.

11 <sup>3</sup> Present address: Janssen Research & Development, Janssen Pharmaceutica, B-2340 Beerse, Belgium.

12 \* Email: [beatriz.rodriguez@gsk.com](mailto:beatriz.rodriguez@gsk.com) and [christopher.schofield@chem.ox.ac.uk](mailto:christopher.schofield@chem.ox.ac.uk)

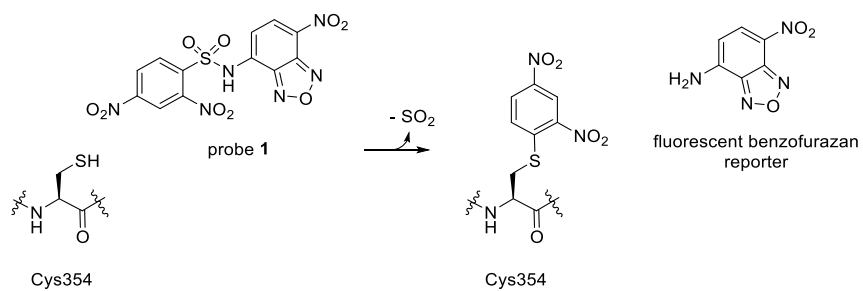

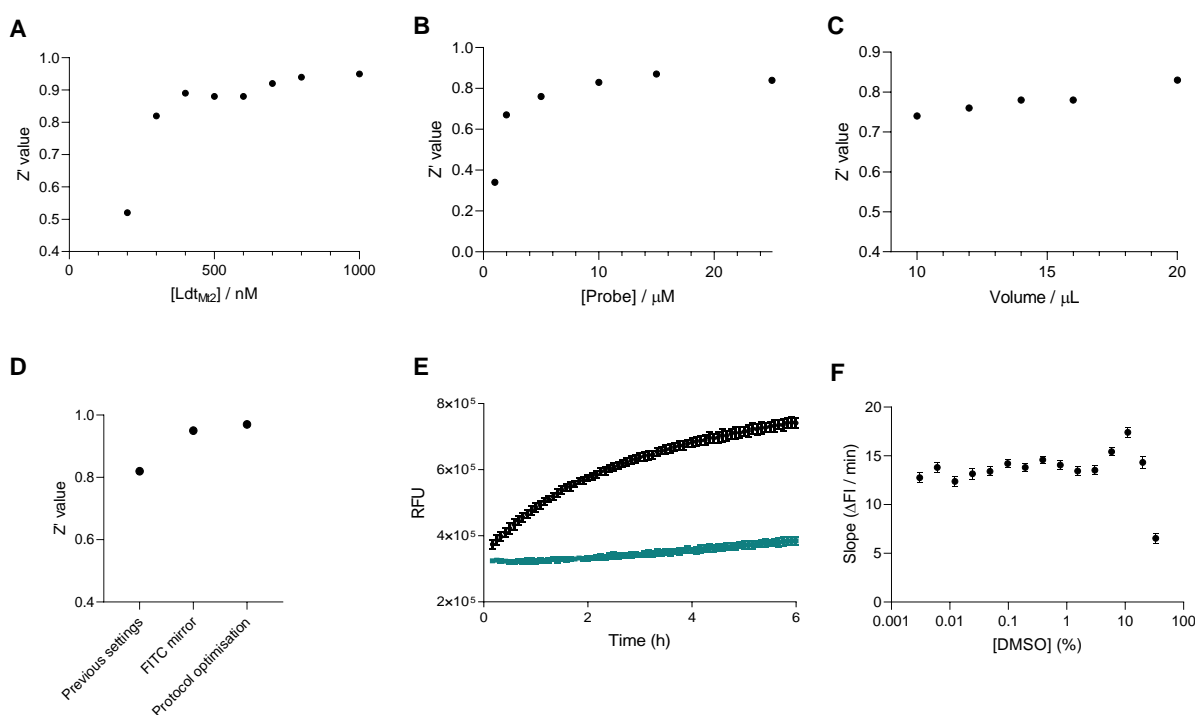

17

18 **Figure S2. Optimisation of the HTS assay for Ldt<sub>Mt2</sub>.** (A) Z' values obtained with varying concentrations  
 19 of Ldt<sub>Mt2</sub> at a fixed probe **1** concentration (20 μM). The Z' values were ≥ 0.8 for Ldt<sub>Mt2</sub> concentrations ≥  
 20 300 nM. (B) Z' values obtained with varying concentrations of probe **1** at a fixed Ldt<sub>Mt2</sub> concentration  
 21 (300 nM). The optimal Z' value (0.87) was obtained with probe **1** at 15 μM. (C) Z' values obtained with  
 22 varying reaction volumes, using fixed Ldt<sub>Mt2</sub> (300 nM) and probe **1** (15 μM) concentrations. A lower  
 23 reaction volume decreased the Z' value, but up to a volume of 10 μL, the Z' values are sufficiently high  
 24 (≥ 0.40). (D) Optimisation of the plate reader settings improved the Z' values of the assay. The  
 25 optimisation protocol included exchanging the general dual mirror to a FITC mirror increases the Z'  
 26 value from 0.82 to 0.95. Optimising the plate reader protocol in terms of coordinates of corners,  
 27 measurement height and gain further improved the Z' value to 0.97. (E) Time-course of the relative  
 28 fluorescence units (RFU) measured on reaction of probe **1** (15 μM) with (300 nM, black) and without  
 29 (teal) Ldt<sub>Mt2</sub> at room temperature in (error bars; SD, n=32). The reaction between probe **1** and Ldt<sub>Mt2</sub>  
 30 was shown to reach completion after 5 hours, with the initial linear phase lasting 1 hour. (F) DMSO  
 31 interference assay. Assays were performed at varied DMSO concentrations (error bars; SD, n=4). Up to  
 32 a concentration of 3% (v/v) DMSO did not affect the assay. Assays were carried out with 300 nM Ldt<sub>Mt2</sub>  
 33 and 15 μM probe **1** at room temperature. Assays were carried out at room temperature in 50 mM  
 34 sodium phosphate pH 7.5 with 0.01% (v/v) Triton X-100. Assays in (A) and (B) used reaction volumes  
 35 of 25 μL. Assays in (D) - (F) used reaction volumes of 10 μL.

36

37 **Table S1. Influence of detergents on Z' and signal to background ratio (S/B).** The reaction between  
 38 Ldt<sub>Mt2</sub> (300 nM) and probe 1 (15 μM) was monitored at room temperature in 50 mM sodium phosphate  
 39 pH 7.5 in the presence of the indicated detergents. The maximum tolerated concentrations of each  
 40 detergent were determined in interference assays at varying detergent concentrations and were  
 41 defined as the highest tested concentration at which no interference was observed.

| Detergent    | Maximum tolerated concentration (v/v) | Z'   | S/B  |
|--------------|---------------------------------------|------|------|
| Triton X-100 | 0.03%                                 | 0.77 | 2.5  |
| Triton X-114 | 0.02%                                 | 0.77 | 2.3  |
| Tween-20     | 0.007%                                | 0.82 | 3.2  |
| Tween-80     | 0.001%                                | 0.66 | 2.2  |
| MEGA-8       | 1.25%                                 | 0.77 | 3.3  |
| CHAPS        | 0.245%                                | 0.76 | 2.8  |
| BRIJ-35      | 0.000054%                             | N.D. | N.D. |
| IPEGAL-630   | 0.00028%                              | N.D. | N.D. |
| DDM          | 0.00014%                              | N.D. | N.D. |
| BSA          | <0.00064%                             | N.D. | N.D. |
| dBSA         | <0.00064%                             | N.D. | N.D. |

42

43 **Table S2. Stability analysis of Ldt<sub>Mt2</sub> and probe 1 stock solutions.** The stabilities of stock solutions of  
44 Ldt<sub>Mt2</sub> and probe 1 were assessed by comparing the Z' and signal to background ratios (S/B) of the  
45 assay using fresh and aged (7 h, on ice) stock solutions. The results show very similar Z' and S/B values.  
46 Assays were carried out with 300 nM Ldt<sub>Mt2</sub> and 15 μM probe 1 at room temperature in 50 mM sodium  
47 phosphate pH 7.5 with 0.007% (v/v) Tween-20.

|                    | <b>Z'</b> | <b>S/B</b> |
|--------------------|-----------|------------|
| Fresh stocks       | 0.97      | 14.5       |
| 7 hours old stocks | 0.96      | 14.4       |

48

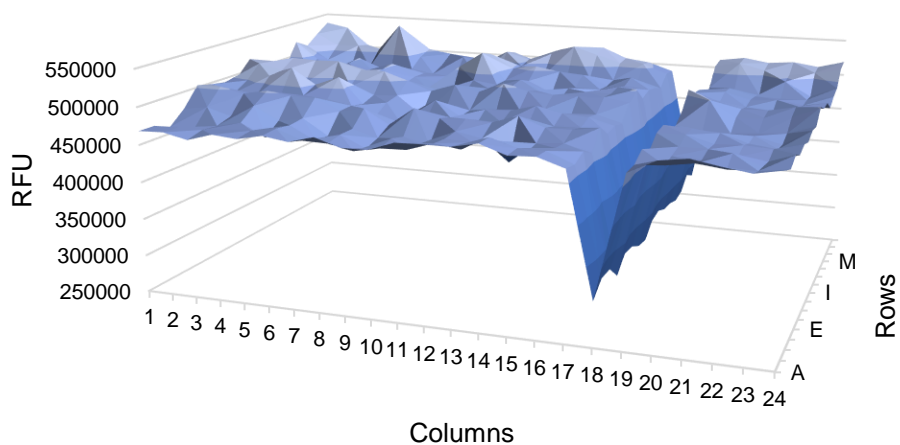

49

50 **Figure S3. Analysis of a 384-well plate to test for variance in plate patterns.** The full plate analysis  
 51 using final assay conditions (300 nM Ldt<sub>Mt2</sub> and 15 μM probe 1 at room temperature in 50 mM sodium  
 52 phosphate pH 7.5 with 0.007% (v/v) Tween-20) shows no evidence for non-specific patterns across the  
 53 assay plate, as measured 1 h after start of the reaction. Column 18 represents the no enzyme control.

54

55 **Table S3. Dose-response analysis results for tool compounds.** Compounds were incubated with Ldt<sub>MT2</sub>  
 56 or BlaC (10 min.), then assayed using the optimised assay conditions (see Experimental Details).  
 57 Inhibition assays of Ldt<sub>MT2</sub> were carried out with 300 nM Ldt<sub>MT2</sub> and 15 μM probe **1** at room temperature  
 58 in 50 mM sodium phosphate pH 7.5 with 0.007% (v/v) Tween-20. Inhibition assays of BlaC were carried  
 59 out with 2.5 nM BlaC and 2.5 μM FC5 at room temperature in 100 mM sodium phosphate pH 7.5 with  
 60 0.01% (v/v) Triton X-100. pIC<sub>50</sub>s were determined via non-linear regression in Graphpad Prism. (n=4,  
 61 mean ± SD)

| Compound       | Structure | pIC <sub>50</sub> Ldt <sub>MT2</sub><br>(mean ± SD) | pIC <sub>50</sub> BlaC<br>(mean ± SD) |
|----------------|-----------|-----------------------------------------------------|---------------------------------------|
| Faropenem      |           | 6.5 ± 0.04                                          | 6.35 ± 0.03                           |
| Sulopenem      |           | 6.2 ± 0.03                                          | 6.60 ± 0.12                           |
| Panipenem      |           | 6.5 ± 0.05                                          | 6.78 ± 0.01                           |
| Ertapenem      |           | 5.8 ± 0.08                                          | 6.75 ± 0.03                           |
| Doripenem      |           | 5.3 ± 0.16                                          | 7.38 ± 0.04                           |
| Meropenem      |           | 5.0 ± 0.11                                          | 6.85 ± 0.05                           |
| Biapenem       |           | 4.1 ± 0.03                                          | 5.51 ± 0.09                           |
| Flucloxacillin |           | 4.6 ± 0.09                                          | 6.87 ± 0.03                           |

| Compound      | Structure                                                                           | pIC <sub>50</sub> Ldt <sub>Mt2</sub><br>(mean ± SD) | pIC <sub>50</sub> BlaC<br>(mean ± SD) |
|---------------|-------------------------------------------------------------------------------------|-----------------------------------------------------|---------------------------------------|
| Oxacillin     | 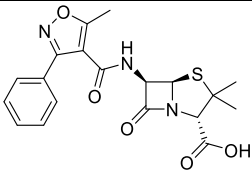   | 4.2 ± 0.03                                          | 6.80 ± 0.01                           |
| Ticarcillin   |    | <4.0                                                | 4.93 ± 0.01                           |
| Carbenicillin |    | <4.0                                                | <4.0                                  |
| Sulbactam     |    | <4.0                                                | 5.12 ± 0.01                           |
| Zidebactam    |   | 4.0 ± 0.02                                          | 4.15 ± 0.10                           |
| Relebactam    |  | <4.0                                                | 4.48 ± 0.01                           |
| Ceftazidime   |  | <4.0                                                | 4.40 ± 0.01                           |
| Cefminox      |  | <4.0                                                | 4.50 ± 0.01                           |
| Cefotaxime    |  | <4.0                                                | <4.0                                  |
| Ceftiofur     |  | <4.0                                                | <4.0                                  |



| Compound              | Structure                                                                         | pIC <sub>50</sub> Ldt <sub>MT2</sub><br>(mean ± SD) | pIC <sub>50</sub> BlaC<br>(mean ± SD) |
|-----------------------|-----------------------------------------------------------------------------------|-----------------------------------------------------|---------------------------------------|
| Iodoacetamide         | 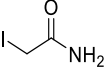 | 5.8 ± 0.03                                          | <4.0                                  |
| Maleimide             |  | 5.4 ± 0.04                                          | <4.0                                  |
| Ebselen               |  | 6.8 ± 0.03                                          | 5.82 ± 0.09                           |
| Benzeneseleninic acid |  | 5.0 ± 0.06                                          | <4.0                                  |
| Thiram                |  | 6.8 ± 0.03                                          | <4.0                                  |
| PX-12                 |  | 5.9 ± 0.01                                          | <4.0                                  |

62

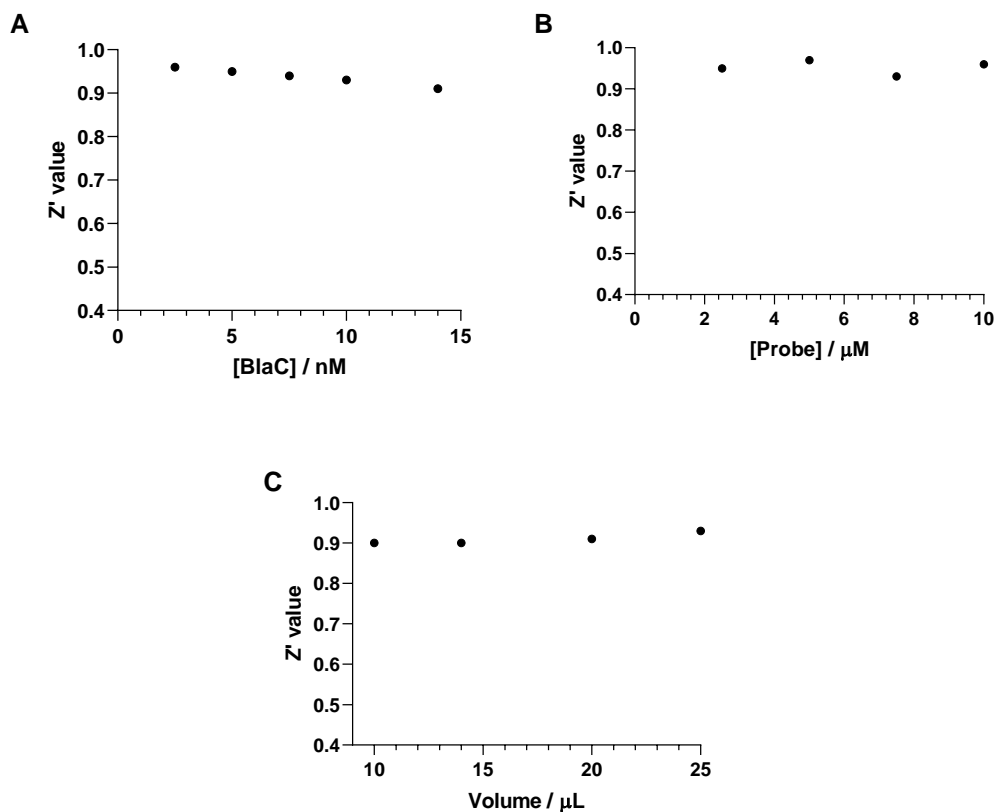

63

64 **Figure S4. Optimisation of the HTS assay for BlaC.** (A) Z' values obtained with varying concentrations  
 65 of BlaC using a fixed concentration of probe FC5<sup>2</sup> (10 μM). (B) Z' values obtained with varying  
 66 concentrations of FC5 using a fixed BlaC concentration (2.5 nM). A Z' value of 0.95 was obtained at a  
 67 FC5 concentration of 2.5 μM. (C) Z' values obtained with varying reaction volumes using fixed BlaC and  
 68 FC5 concentrations (2.5 nM and 2.5 μM, respectively). Assays in (A) and (B) used reaction volumes of  
 69 25 μL. Assays were performed at room temperature in 100 mM sodium phosphate pH 7.5 with 0.01%  
 70 (v/v) Triton X-100.

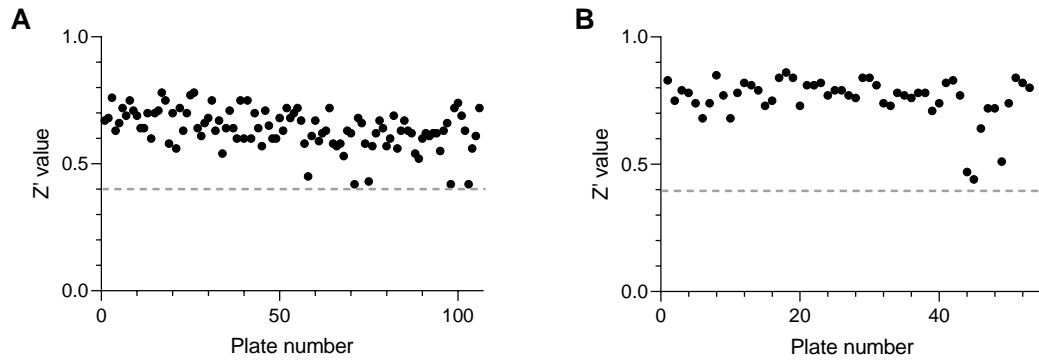

71

72 **Figure S5. Z' values of the plates throughout the HTS campaign. (A)** Z' values for the Ldt<sub>M12</sub> HTS assay.  
73 **(B)** Z' values for the HTS assay for the BlaC HTS assay. The cut-off value for plate acceptance is indicated  
74 at Z' > 0.4.

75

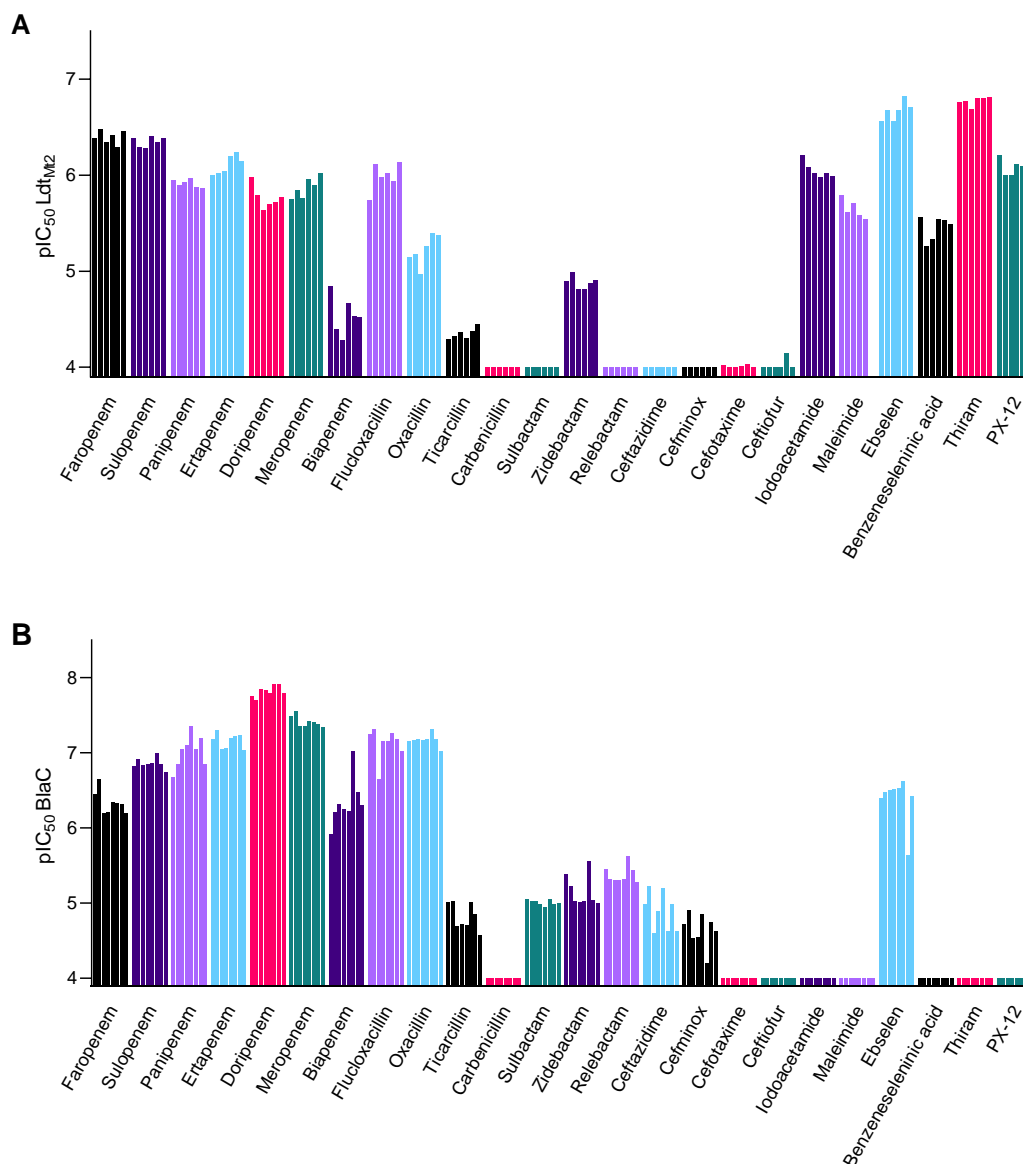

76

77 **Figure S6. Dose response assay results of tool compounds as HTS validation.** pIC<sub>50</sub> values for Ldt<sub>Mt2</sub>  
 78 inhibition **(A)** and BlaC inhibition **(B)** were measured on different days, and show good reproducibility  
 79 for the tested compounds. Inhibition assays of Ldt<sub>Mt2</sub> were carried out with 300 nM Ldt<sub>Mt2</sub> and 15 μM  
 80 probe **1** with 30 minutes inhibitor pre-incubation at room temperature in 50 mM sodium phosphate  
 81 pH 7.5 with 0.007% (v/v) Tween-20. Inhibition assays of BlaC were carried out with 2.5 nM BlaC and  
 82 2.5 μM FC5 with 30 minutes inhibitor pre-incubation at room temperature in 100 mM sodium  
 83 phosphate pH 7.5 with 0.01% (v/v) Triton X-100. Average pIC<sub>50</sub> values and compound structures are  
 84 given in Table S4.

85

86 **Table S4. Validation of the HTS assay using tool compounds.**  $pIC_{50}$  values for  $Ldt_{Mt2}$  and BlaC inhibition,  
 87 as obtained from independent repeats of technical duplicates during the HTS validation. Errors given  
 88 are SD of the independent repeats ( $Ldt_{Mt2}$  assay  $n=6$ , BlaC assay  $n=8$ ). Inhibition assays of  $Ldt_{Mt2}$  were  
 89 carried out with 300 nM  $Ldt_{Mt2}$  and 15  $\mu$ M probe **1** with 30 minutes inhibitor pre-incubation at room  
 90 temperature in 50 mM sodium phosphate pH 7.5 with 0.007% (v/v) Tween-20. Inhibition assays of BlaC  
 91 were carried out with 2.5 nM BlaC and 2.5  $\mu$ M FC5 with 30 minutes inhibitor pre-incubation at room  
 92 temperature in 100 mM sodium phosphate pH 7.5 with 0.01% (v/v) Triton X-100.

| Compound       | Structure | $pIC_{50}$ $Ldt_{Mt2}$<br>(mean $\pm$ SD) | $pIC_{50}$ BlaC<br>(mean $\pm$ SD) |
|----------------|-----------|-------------------------------------------|------------------------------------|
| Faropenem      |           | 6.39 $\pm$ 0.03                           | 6.33 $\pm$ 0.06                    |
| Sulopenem      |           | 6.35 $\pm$ 0.02                           | 6.86 $\pm$ 0.02                    |
| Panipenem      |           | 5.91 $\pm$ 0.02                           | 7.03 $\pm$ 0.06                    |
| Ertapenem      |           | 6.11 $\pm$ 0.04                           | 7.17 $\pm$ 0.03                    |
| Doripenem      |           | 5.77 $\pm$ 0.04                           | 7.85 $\pm$ 0.02                    |
| Meropenem      |           | 5.87 $\pm$ 0.04                           | 7.39 $\pm$ 0.03                    |
| Biapenem       |           | 5.54 $\pm$ 0.07                           | 6.32 $\pm$ 0.11                    |
| Flucloxacillin |           | 5.98 $\pm$ 0.06                           | 7.11 $\pm$ 0.07                    |

| Compound      | Structure                                                                           | pIC <sub>50</sub> Ldt <sub>Mt2</sub><br>(mean ± SD) | pIC <sub>50</sub> BlaC<br>(mean ± SD) |
|---------------|-------------------------------------------------------------------------------------|-----------------------------------------------------|---------------------------------------|
| Oxacillin     | 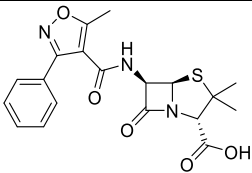   | 5.22 ± 0.06                                         | 7.17 ± 0.03                           |
| Ticarcillin   |    | 4.35 ± 0.02                                         | 4.84 ± 0.06                           |
| Carbenicillin |    | <4.0                                                | <4.0                                  |
| Sulbactam     |    | <4.0                                                | 5.02 ± 0.03                           |
| Zidebactam    |   | 4.88 ± 0.02                                         | 5.14 ± 0.10                           |
| Relebactam    |  | <4.0                                                | 5.40 ± 0.04                           |
| Ceftazidime   |  | <4.0                                                | 4.92 ± 0.07                           |
| Cefminox      |  | <4.0                                                | 4.66 ± 0.08                           |
| Cefotaxime    |  | <4.0                                                | <4.0                                  |
| Ceftiofur     |  | <4.0                                                | <4.0                                  |

| Compound              | Structure                                                                         | pIC <sub>50</sub> Ldt <sub>MT2</sub><br>(mean ± SD) | pIC <sub>50</sub> BlaC<br>(mean ± SD) |
|-----------------------|-----------------------------------------------------------------------------------|-----------------------------------------------------|---------------------------------------|
| Iodoacetamide         | 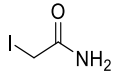 | 6.05 ± 0.03                                         | <4.0                                  |
| Maleimide             |  | 5.65 ± 0.04                                         | <4.0                                  |
| Ebselen               |  | 6.67 ± 0.04                                         | 6.52 ± 0.04                           |
| Benzeneseleninic acid |  | 5.45 ± 0.05                                         | <4.0                                  |
| Thiram                |  | 6.77 ± 0.02                                         | <4.0                                  |
| PX-12                 |  | 6.09 ± 0.03                                         | <4.0                                  |

93

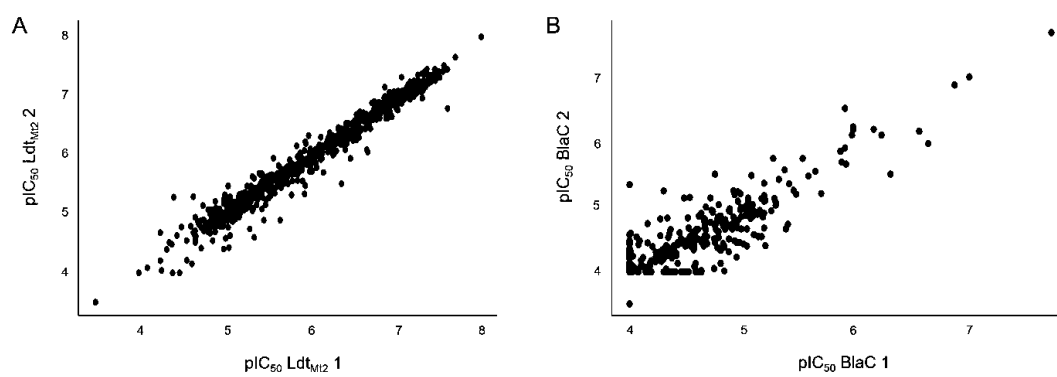

94

95 **Figure S7. Correlation between pIC<sub>50</sub> values from two independent repeats in the HTS. (A)** for Ldt<sub>Mt2</sub>  
 96 and **(B)** for BlaC of the two independent repeats using the standard assay conditions (Figure S2E, Figure  
 97 S4C).

98



99 **Table S5. Eight classes of compounds identified from the Ldt<sub>Mt2</sub> HTS.** MW: Molecular weight. LE:  
 100 Ligand efficiency. T<sub>m</sub>: Melting point (°C) of Ldt<sub>Mt2</sub> after pre-incubation with the compound as measured  
 101 using SYPRO Orange (6 x concentrated, according to the manufacturer's (Invitrogen) protocol) in 50  
 102 mM Tris pH 7.5. ΔT<sub>m</sub>: Difference in melting point (T<sub>m</sub>) of Ldt<sub>Mt2</sub> after pre-incubation with the compound  
 103 relative to unreacted Ldt<sub>Mt2</sub> (43.8 °C). k<sub>chem</sub>: apparent intrinsic thiol reactivity as measured with L-  
 104 glutathione and probe **2** (Figure S20).

| Class           | Compound                                                                            | MW (Da) | pIC <sub>50</sub>  |              | LE   | T <sub>m</sub> (ΔT <sub>m</sub> ) | k <sub>inact</sub> /K <sub>i</sub> (M <sup>-1</sup> s <sup>-1</sup> ) | k <sub>chem</sub> (M <sup>-1</sup> s <sup>-1</sup> ) |
|-----------------|-------------------------------------------------------------------------------------|---------|--------------------|--------------|------|-----------------------------------|-----------------------------------------------------------------------|------------------------------------------------------|
|                 |                                                                                     |         | Ldt <sub>Mt2</sub> | BlaC         |      |                                   |                                                                       |                                                      |
| α-chloro ketone | 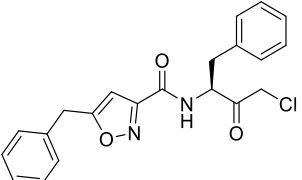   | 382.85  | 7.34 ± 0.045       | <4.0         | 0.41 | N.D.                              | 1152 ± 87                                                             | 0.11 ± 0.02                                          |
|                 |    | 297.78  | 7.11 ± 0.010       | <4.0         | 0.56 | 43.7 ± 0.09 (-0.1)                | 68.4 ± 3.5                                                            | 0.15 ± 0.02                                          |
| Maleimides      |    | 173.17  | 7.15 ± 0.030       | 5.03 ± 0.045 | 0.86 | 45.0 ± 0.16 (+1.2)                | 3991 ± 356                                                            | 129.9 ± 9.9                                          |
|                 |   | 269.25  | 7.06 ± 0.035       | 4.22 ± 0.060 | 0.62 | 45.6 ± 0.28 (+1.8)                | 36.5 ± 7.9                                                            | 34.2 ± 1.0                                           |
|                 |  | 299.71  | 7.40 ± 0.010       | 4.71 ± 0.055 | 0.53 | 43.6 ± 0.16 (-0.2)                | 116 ± 6.2                                                             | 91.8 ± 1.8                                           |
|                 |  | 288.30  | 7.24 ± 0.005       | 5.19 ± 0.005 | 0.52 | 45.5 ± 0.09 (+1.7)                | 127 ± 7.7                                                             | 61.6 ± 0.78                                          |
|                 |  | 231.21  | 7.02 ± 0.000       | 4.18 ± 0.175 | 0.66 | 43.1 ± 0.09 (-0.7)                | 156 ± 5.1                                                             | 91.7 ± 4.5                                           |
|                 |  | 435.71  | 7.16 ± 0.035       | <4.0         | 0.43 | 44.5 ± 1.23 (+0.7)                | 91.6 ± 2.0                                                            | 1.53 ± 0.15                                          |
|                 |  | 306.34  | 6.68 ± 0.025       | 4.58 ± 0.010 | 0.53 | 43.1 ± 0.09 (-0.7)                | 90.7 ± 4.7                                                            | 1.76 ± 0.20                                          |
| Acrylamides     |  | 282.30  | 6.37 ± 0.005       | 4.29 ± 0.290 | 0.54 | 44.5 ± 0.19 (-0.7)                | 16.0 ± 0.75                                                           | 0.79 ± 0.02                                          |

| Class                   | Compound                                                                            | MW (Da) | pIC <sub>50</sub>  |              | LE   | T <sub>m</sub> (ΔT <sub>m</sub> ) | k <sub>inact</sub> /K <sub>i</sub> (M <sup>-1</sup> s <sup>-1</sup> ) | k <sub>chem</sub> (M <sup>-1</sup> s <sup>-1</sup> ) |
|-------------------------|-------------------------------------------------------------------------------------|---------|--------------------|--------------|------|-----------------------------------|-----------------------------------------------------------------------|------------------------------------------------------|
|                         |                                                                                     |         | Ldt <sub>Mt2</sub> | BlaC         |      |                                   |                                                                       |                                                      |
| Acrylamides (continued) | 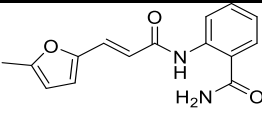   | 270.29  | 6.24 ± 0.030       | <4.0         | 0.56 | 44.0 ± 0.16 (+0.2)                | 172 ± 6.0                                                             | 0.27 ± 0.05                                          |
|                         |    | 268.27  | 6.13 ± 0.115       | <4.0         | 0.56 | 44.1 ± 0.09 (+0.3)                | N.D.                                                                  | 0.55 ± 0.11                                          |
| Fumaryl-amides          |    | 224.65  | 6.38 ± 0.080       | <4.0         | 0.75 | 44.8 ± 0.00 (+1.0)                | 6.48 ± 0.11                                                           | 6.1 ± 0.52                                           |
|                         |    | 204.23  | 6.11 ± 0.020       | <4.0         | 0.75 | 44.9 ± 0.09 (+1.1)                | 1.20 ± 0.15                                                           | 13.0 ± 1.0                                           |
| Ebsulfur analogue       |    | 264.13  | 7.99 ± 0.040       | 6.37 ± 0.175 | 0.74 | 43.5 ± 0.09 (-0.3)                | N.D.                                                                  | N.D.                                                 |
| Isatins                 |    | 404.26  | 6.75 ± 0.015       | 4.44 ± 0.015 | 0.45 | 46.8 ± 0.00 (+3.0)                | N.D.                                                                  | <0.08                                                |
|                         |  | 390.23  | 6.24 ± 0.140       | <4.0         | 0.47 | 46.8 ± 0.00 (+3.0)                | N.D.                                                                  | <0.08                                                |
|                         |  | 366.21  | 6.52 ± 0.005       | <4.0         | 0.49 | 46.2 ± 0.00 (+2.4)                | N.D.                                                                  | <0.08                                                |
| β-Lactams               |  | 477.52  | 5.62 ± 0.100       | <4.0         | 0.35 | 42.9 ± 0.09 (-0.9)                | N.D.                                                                  | N.D.                                                 |
|                         |  | 625.66  | 5.55 ± 0.045       | 7.72 ± 0.015 | 0.28 | 42.7 ± 0.25 (-1.1)                | N.D.                                                                  | N.D.                                                 |

| Class                                                                               | Compound                                                                            | MW (Da)                                                                             | pIC <sub>50</sub>  |              | LE   | T <sub>m</sub> (ΔT <sub>m</sub> ) | k <sub>inact</sub> /K <sub>i</sub> (M <sup>-1</sup> s <sup>-1</sup> ) | k <sub>chem</sub> (M <sup>-1</sup> s <sup>-1</sup> ) |             |
|-------------------------------------------------------------------------------------|-------------------------------------------------------------------------------------|-------------------------------------------------------------------------------------|--------------------|--------------|------|-----------------------------------|-----------------------------------------------------------------------|------------------------------------------------------|-------------|
|                                                                                     |                                                                                     |                                                                                     | Ldt <sub>Mt2</sub> | BlaC         |      |                                   |                                                                       |                                                      |             |
| β-Lactams<br>(continued)                                                            | 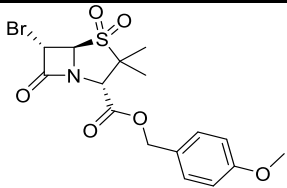   | 432.29                                                                              | 6.40 ± 0.035       | 4.58 ± 0.195 | 0.45 | 43.1 ± 0.09 (-0.7)                | 53.2 ± 4.7                                                            | 2.03 ± 0.76                                          |             |
|                                                                                     |    | 305.23                                                                              | 7.53 ± 0.010       | <4.0         | 0.51 | 42.5 ± 0.09 (-1.3)                | 55.1 ± 3.0                                                            | 20.3 ± 0.9                                           |             |
|                                                                                     |    | 305.23                                                                              | 7.33 ± 0.065       | <4.0         | 0.51 | 42.5 ± 0.09 (-1.3)                | 265 ± 17                                                              | 15.0 ± 0.41                                          |             |
|                                                                                     |    | 221.22                                                                              | 7.34 ± 0.030       | <4.0         | 0.66 | 42.0 ± 0.00 (-1.8)                | 158 ± 5.7                                                             | 27.1 ± 2.3                                           |             |
|                                                                                     |   | 221.22                                                                              | 7.34 ± 0.050       | <4.0         | 0.66 | 42.4 ± 0.00 (-1.8)                | 77.5 ± 6.0                                                            | 28.7 ± 1.9                                           |             |
|                                                                                     |  | 271.28                                                                              | 7.45 ± 0.015       | 4.83 ± 0.110 | 0.53 | 41.7 ± 0.09 (-2.1)                | 65.0 ± 4.4                                                            | 11.4 ± 0.62                                          |             |
|                                                                                     | Nitriles                                                                            |  | 244.32             | 7.02 ± 0.025 | <4.0 | 0.66                              | 42.5 ± 0.09 (-1.3)                                                    | 14.0 ± 0.73                                          | 6.50 ± 0.25 |
|                                                                                     |                                                                                     |  | 228.25             | 6.39 ± 0.120 | <4.0 | 0.66                              | 42.3 ± 0.09 (-1.5)                                                    | 7.41 ± 0.40                                          | 2.12 ± 0.15 |
|  |                                                                                     | 302.36                                                                              | 7.28 ± 0.010       | 6.18 ± 0.040 | 0.51 | 42.9 ± 0.19 (-0.9)                | 1164 ± 105                                                            | 42.1 ± 0.82                                          |             |
|  |                                                                                     | 316.39                                                                              | 7.25 ± 0.065       | 6.11 ± 0.150 | 0.49 | 42.2 ± 0.00 (-1.6)                | 236 ± 9.5                                                             | N.D.                                                 |             |
|  |                                                                                     | 303.35                                                                              | 7.32 ± 0.055       | 4.95 ± 0.070 | 0.51 | 42.1 ± 0.10 (-1.7)                | 609 ± 11                                                              | 21.0 ± 1.4                                           |             |
|  |                                                                                     | 319.36                                                                              | 7.31 ± 0.045       | 4.73 ± 0.080 | 0.47 | 42.3 ± 0.09 (-1.5)                | 86.3 ± 2.6                                                            | 3.58 ± 0.19                                          |             |

| Class                   | Compound                                                                            | MW (Da) | pIC <sub>50</sub>  |              | LE   | T <sub>m</sub> (ΔT <sub>m</sub> ) | k <sub>inact</sub> /K <sub>i</sub> (M <sup>-1</sup> s <sup>-1</sup> ) | k <sub>chem</sub> (M <sup>-1</sup> s <sup>-1</sup> ) |
|-------------------------|-------------------------------------------------------------------------------------|---------|--------------------|--------------|------|-----------------------------------|-----------------------------------------------------------------------|------------------------------------------------------|
|                         |                                                                                     |         | Ldt <sub>Mt2</sub> | BlaC         |      |                                   |                                                                       |                                                      |
| Nitriles<br>(continued) | 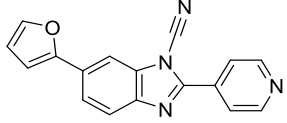   | 286.29  | 6.95 ± 0.045       | 6.09 ± 0.125 | 0.51 | 43.3 ± 0.09 (-0.5)                | 71.8 ± 1.1                                                            | 12.9 ± 0.67                                          |
|                         |    | 297.32  | 7.20 ± 0.080       | <4.0         | 0.49 | 42.1 ± 0.09 (-1.7)                | 68.4 ± 2.7                                                            | 31.0 ± 1.6                                           |
|                         |    | 297.32  | 7.01 ± 0.015       | 5.91 ± 0.385 | 0.49 | 42.9 ± 0.34 (-0.9)                | 8.88 ± 0.39                                                           | 16.8 ± 0.61                                          |
|                         |    | 324.34  | 7.11 ± 0.050       | <4.0         | 0.45 | 40.8 ± 0.59 (-3.0)                | 51.0 ± 3.4                                                            | 61.6 ± 2.7                                           |
|                         |    | 300.14  | 6.43 ± 0.025       | 4.47 ± 0.075 | 0.59 | 42.3 ± 0.09 (-1.5)                | 8.44 ± 1.2                                                            | 0.30 ± 0.03                                          |
|                         |   | 341.46  | 6.15 ± 0.010       | <4.0         | 0.45 | 42.8 ± 0.00 (-1.0)                | N.D.                                                                  | N.D.                                                 |
|                         |  | 327.43  | 6.29 ± 0.065       | <4.0         | 0.47 | 43.1 ± 0.10 (-0.7)                | N.D.                                                                  | N.D.                                                 |

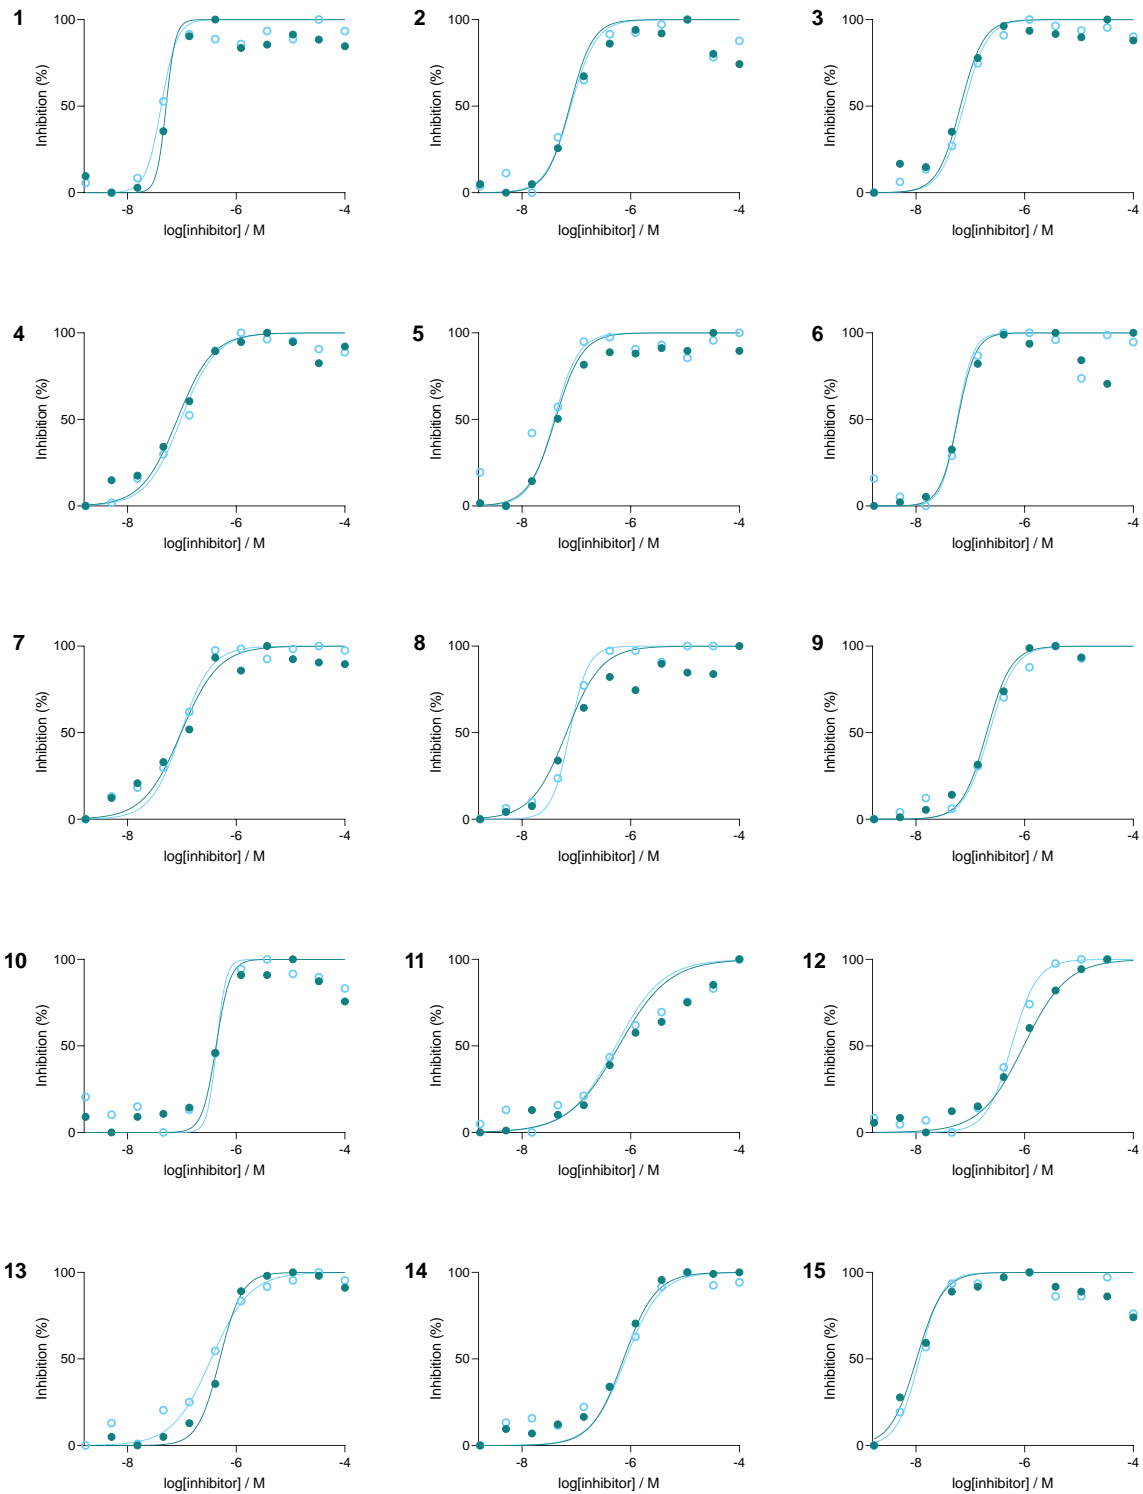

105

106 **Figure S8. Dose-response curves for compounds 1-39 with Ldt<sub>M12</sub> (figure continues).**

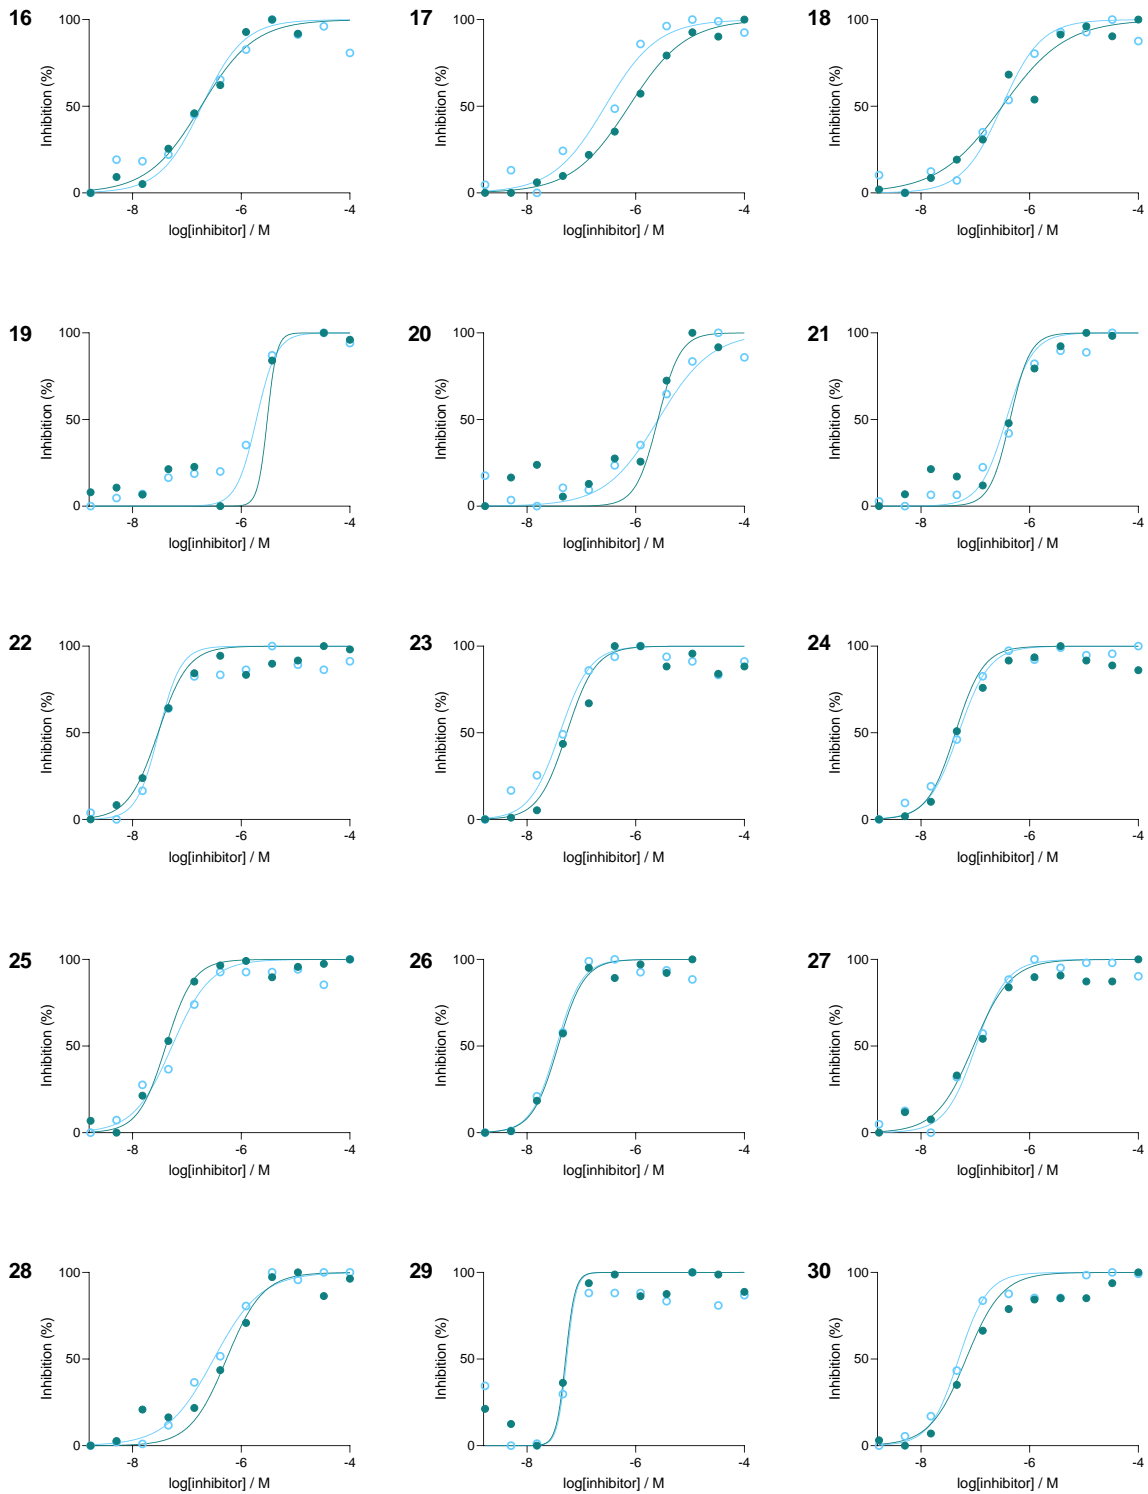

107

108 **Figure S8. Dose-response curves for compounds 1-39 with  $Ldt_{M12}$  (figure continues).**

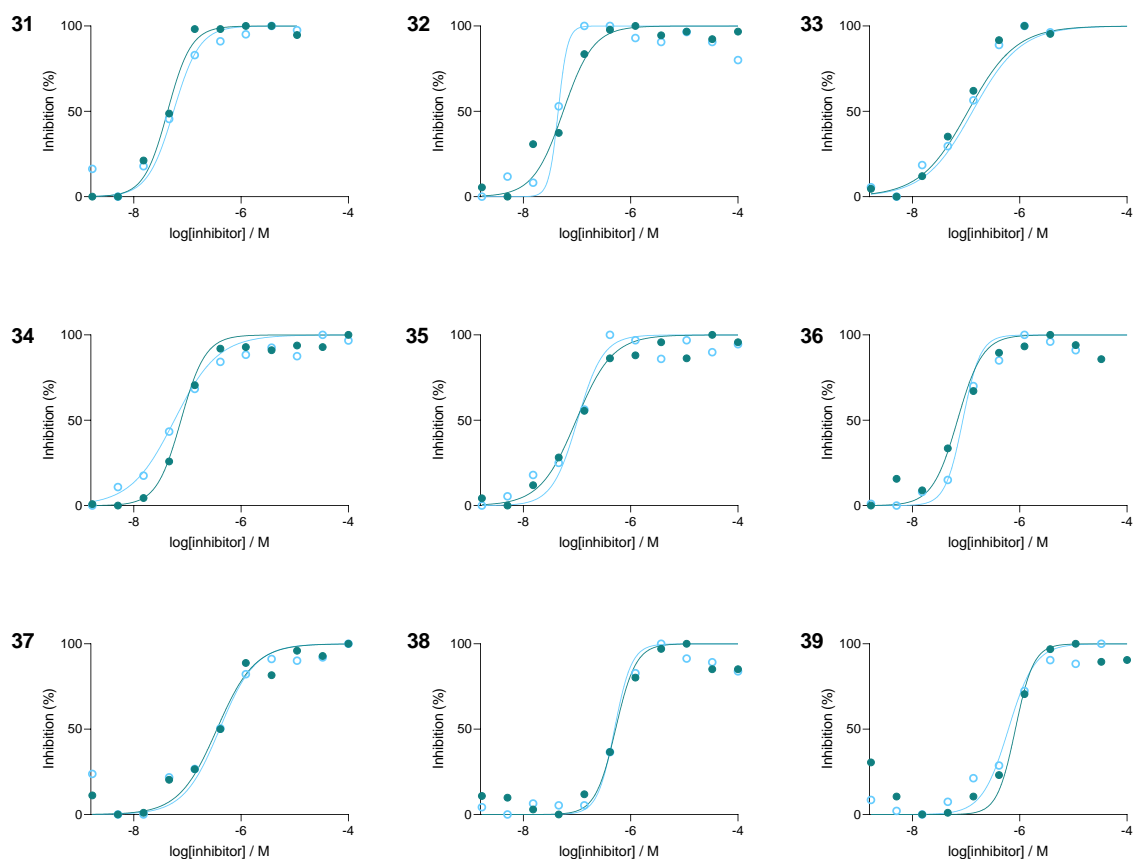

109

110 **Figure S8. Dose-response curves for compounds 1-39 with Ldt<sub>Mt2</sub>.** Inhibition assays of Ldt<sub>Mt2</sub> were  
 111 carried out with 300 nM Ldt<sub>Mt2</sub> and 15  $\mu$ M probe **1** with a 30 minute inhibitor pre-incubation at room  
 112 temperature in 50 mM sodium phosphate pH 7.5 with 0.007% (v/v) Tween-20. Two independent  
 113 repeats are shown in teal and cyan. Average pIC<sub>50</sub> values and compound structures are given in Table  
 114 S5.

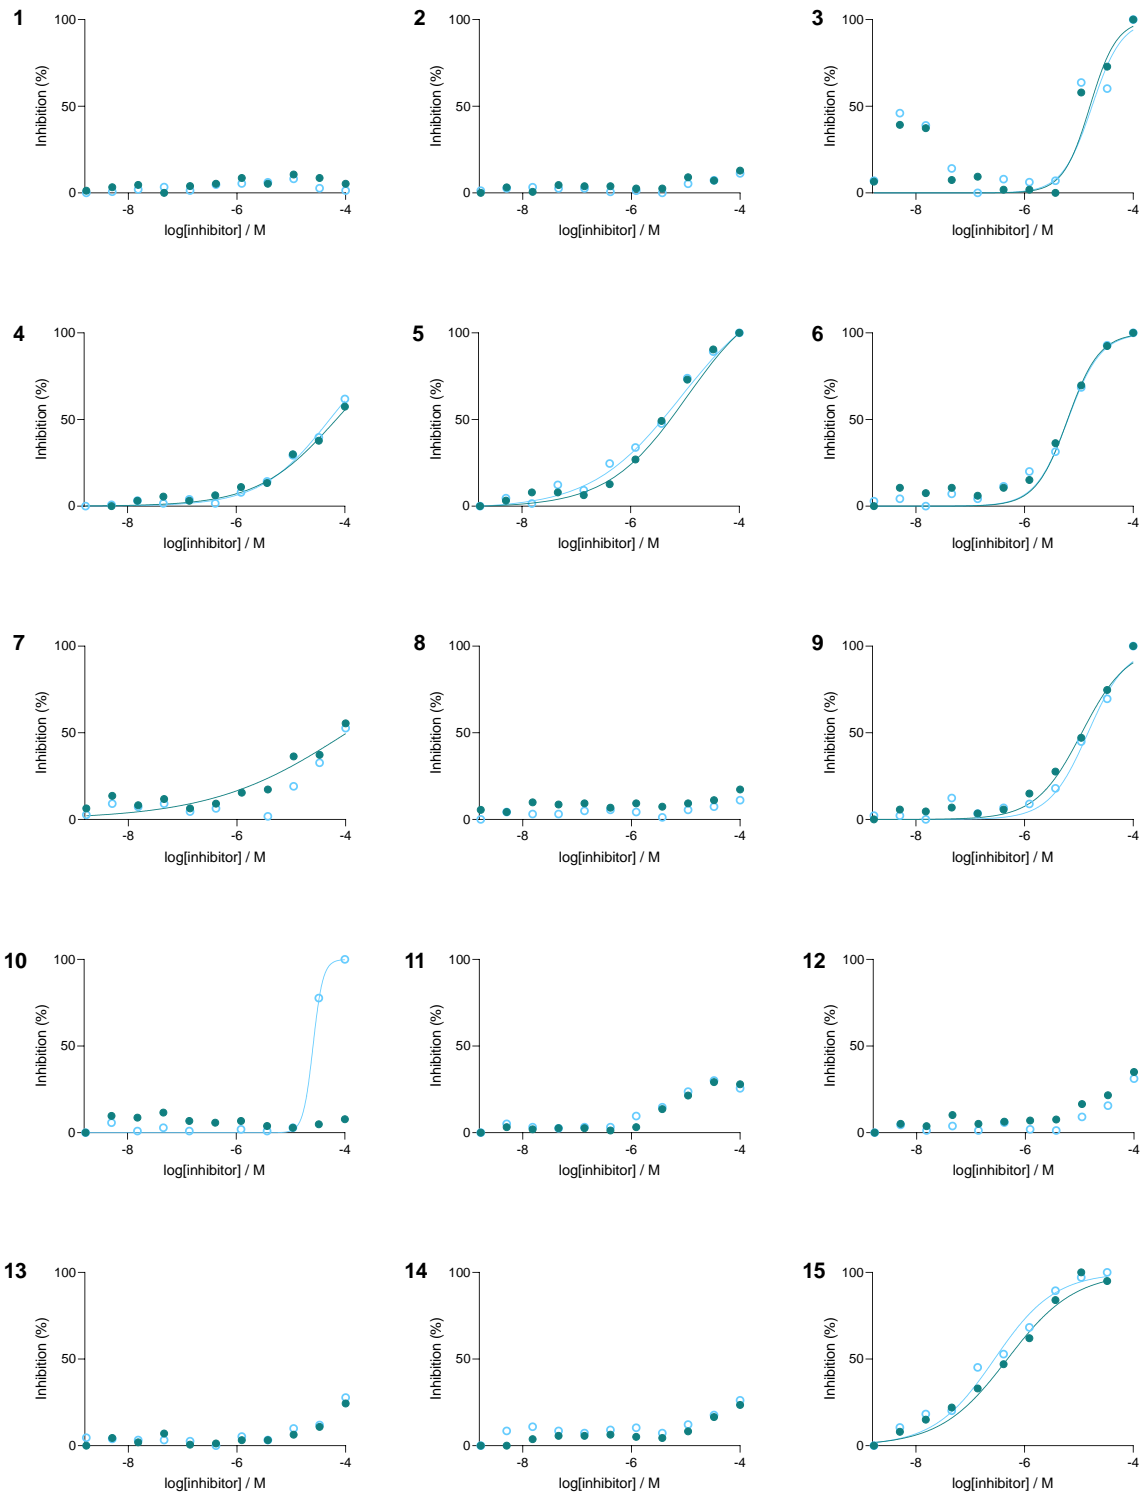

115

116 **Figure S9. Dose-response curves for compounds 1-39 with BlaC (figure continues).**



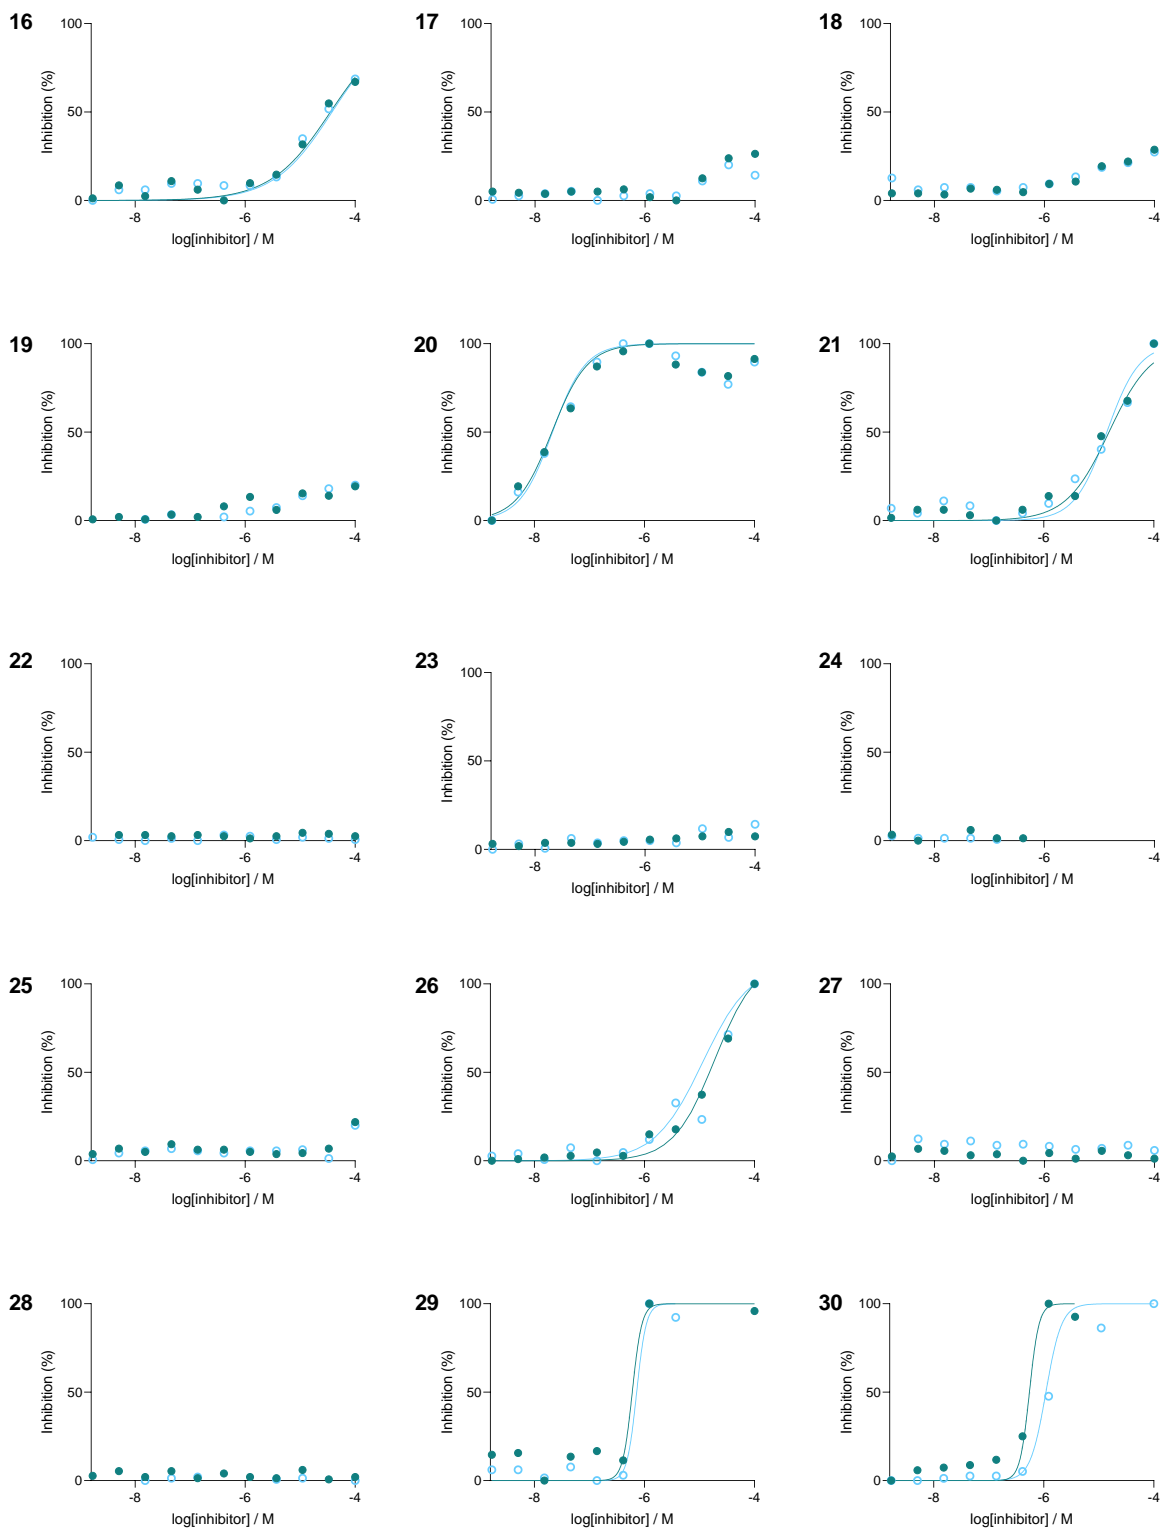

117

118 **Figure S9. Dose-response curves for compounds 1-39 with BlaC (figure continues).**

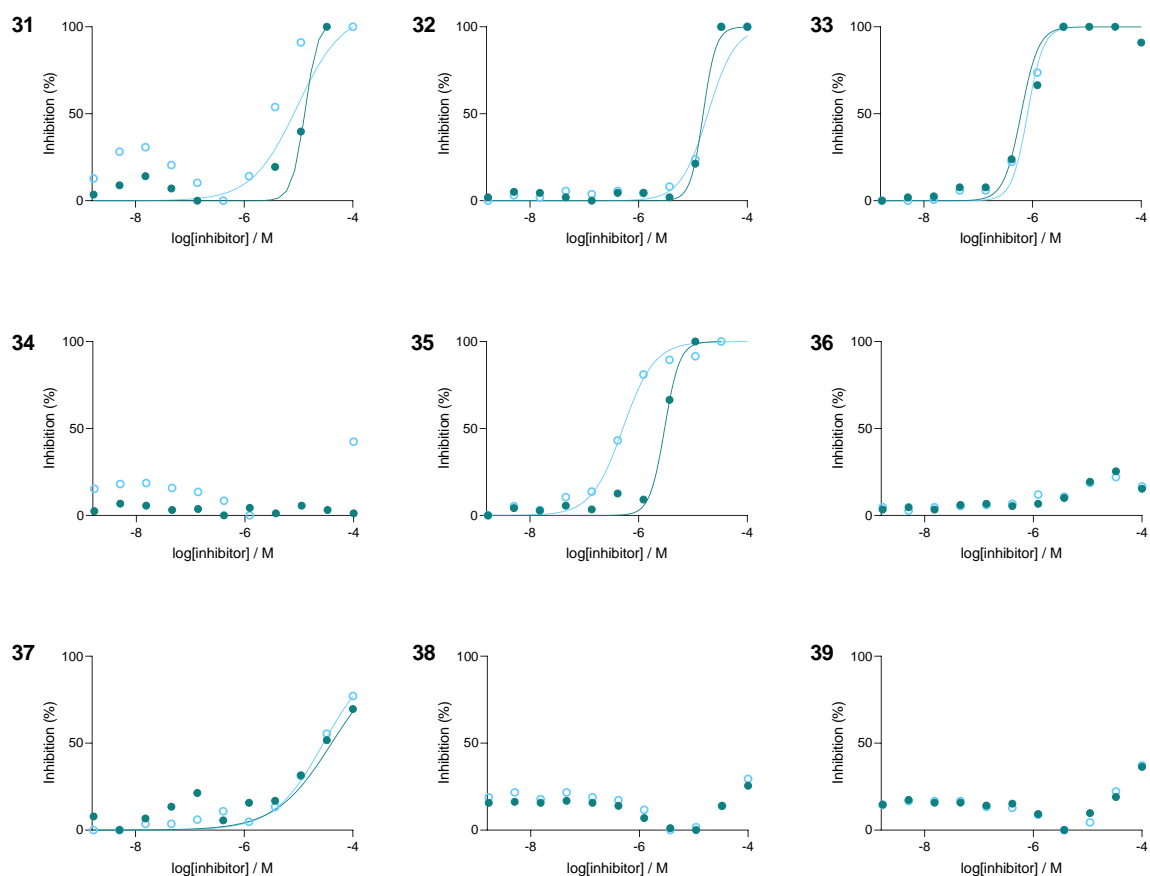

119

120 **Figure S9. Dose-response curves for compounds 1-39 with BlaC.** Inhibition assays of BlaC were carried  
 121 out with 2.5 nM BlaC and 2.5  $\mu$ M FC5 with a 30 minute inhibitor pre-incubation at room temperature  
 122 in 100 mM sodium phosphate pH 7.5 with 0.01% (v/v) Triton X-100. Two independent repeats are  
 123 shown in teal and cyan. Average pIC<sub>50</sub> values and compound structures are given in Table S5.

124

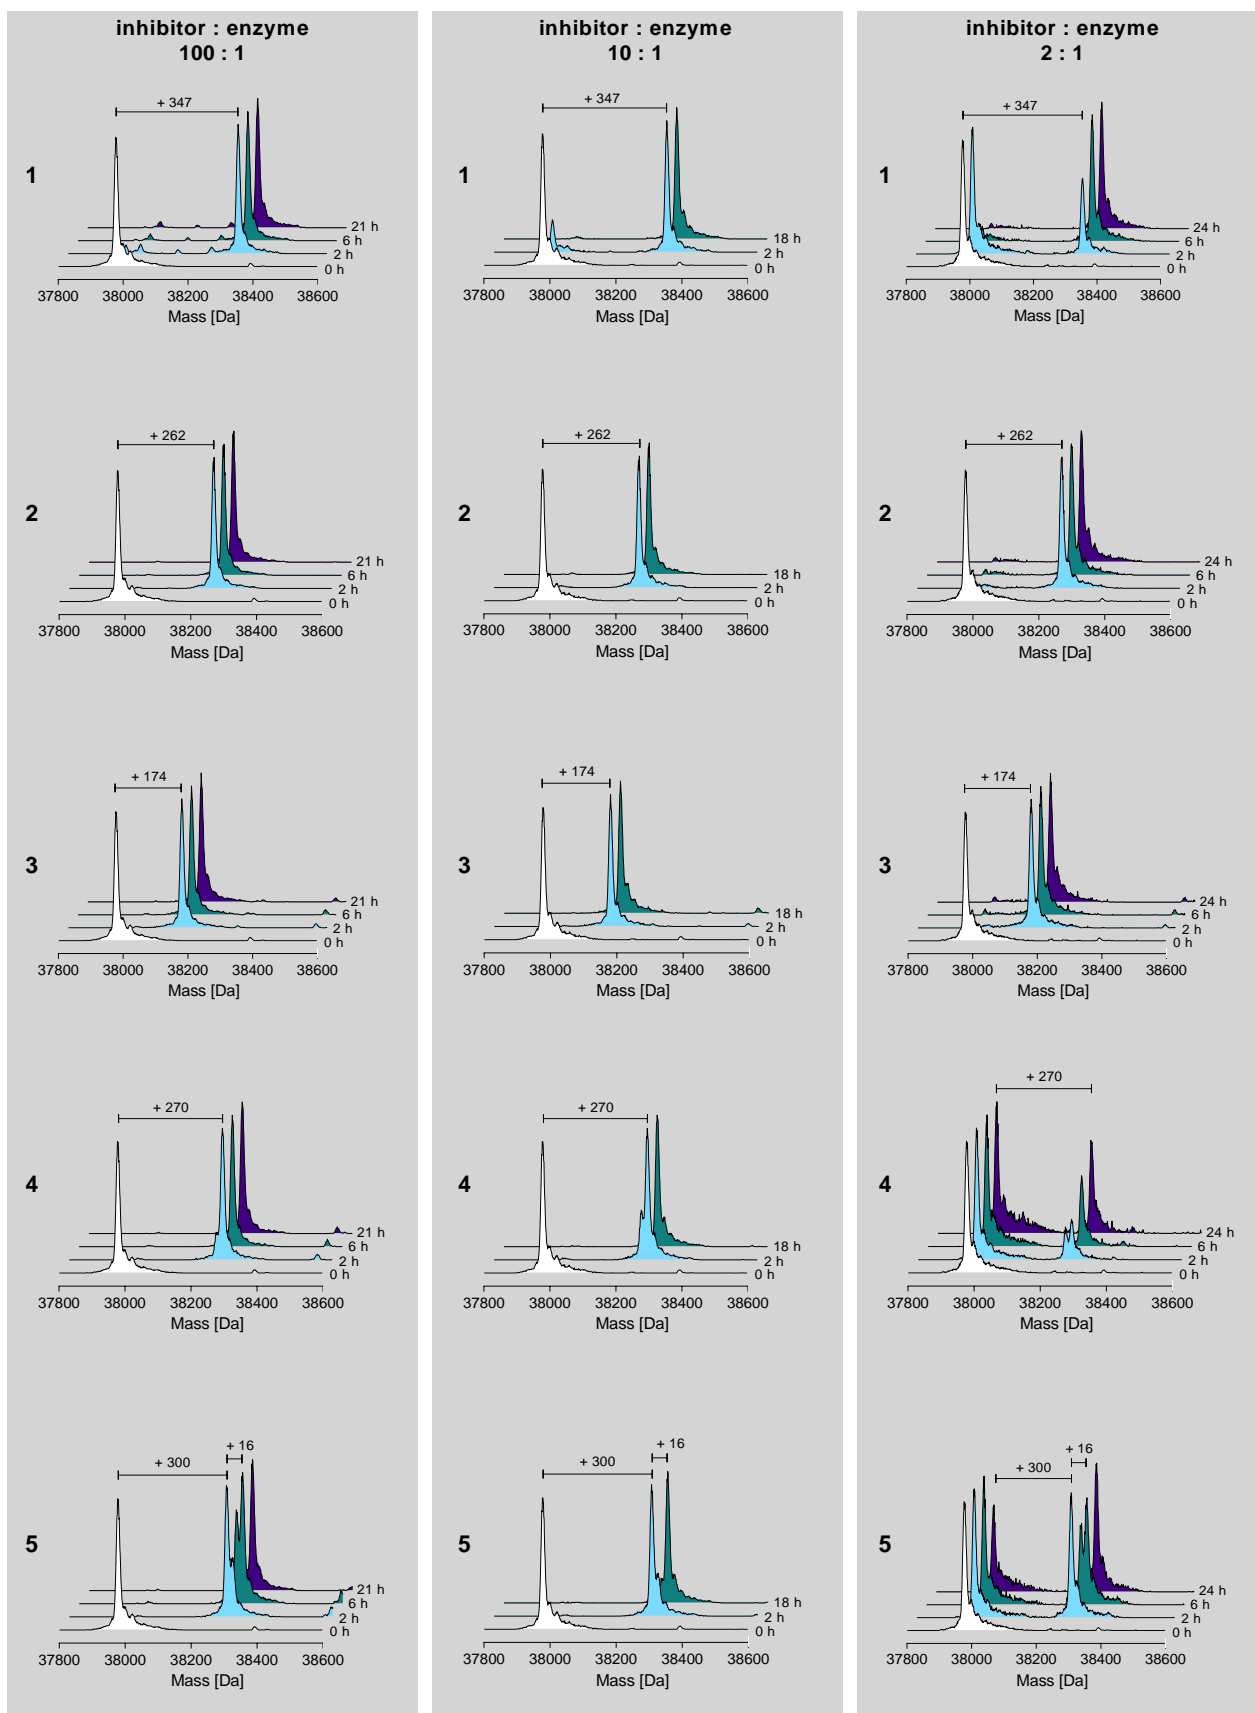

125

126 **Figure S10. Protein observed SPE-MS analysis for the reaction of Ldt<sub>M12</sub> with inhibitors 1-21 (figure**  
 127 **continues).**

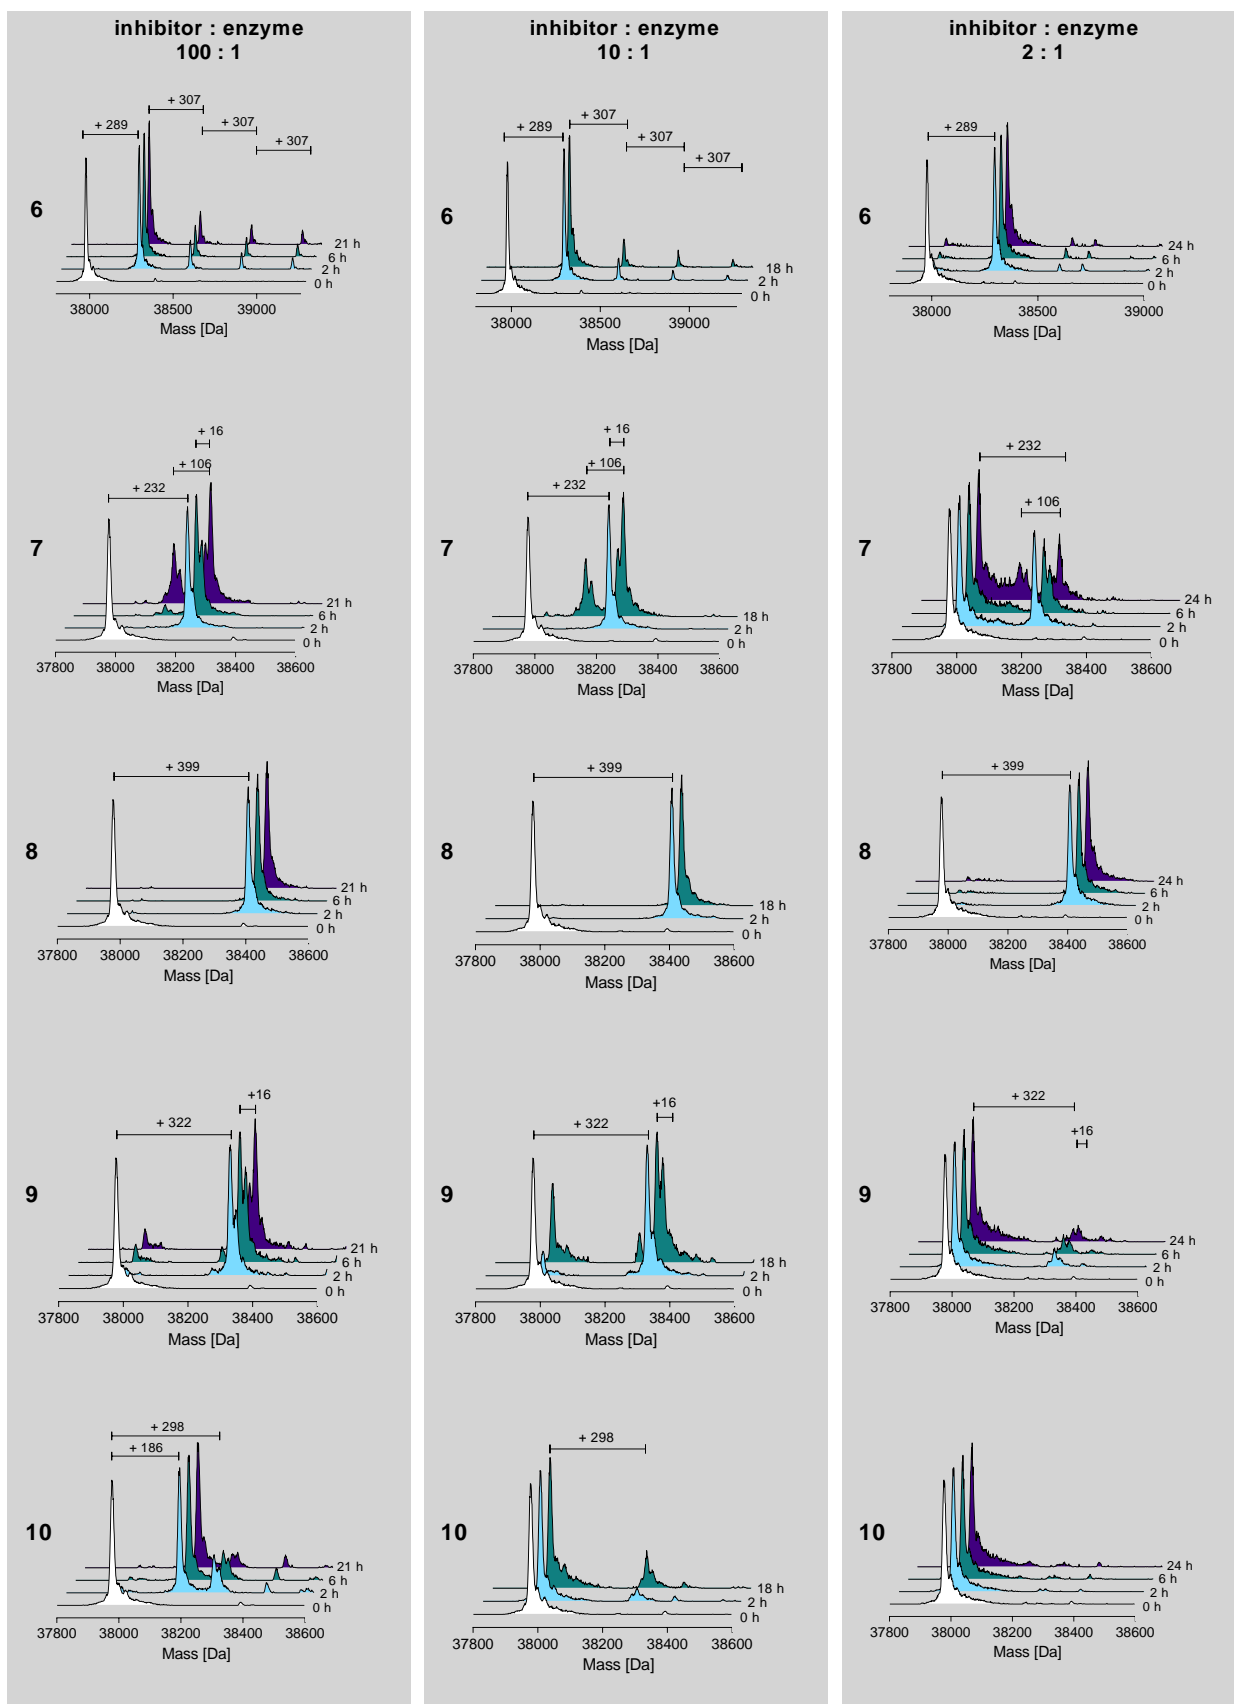

128

129 **Figure S10. Protein observed SPE-MS analysis for the reaction of Ldt<sub>Mt2</sub> with inhibitors 1-21 (figure**  
 130 **continues).**

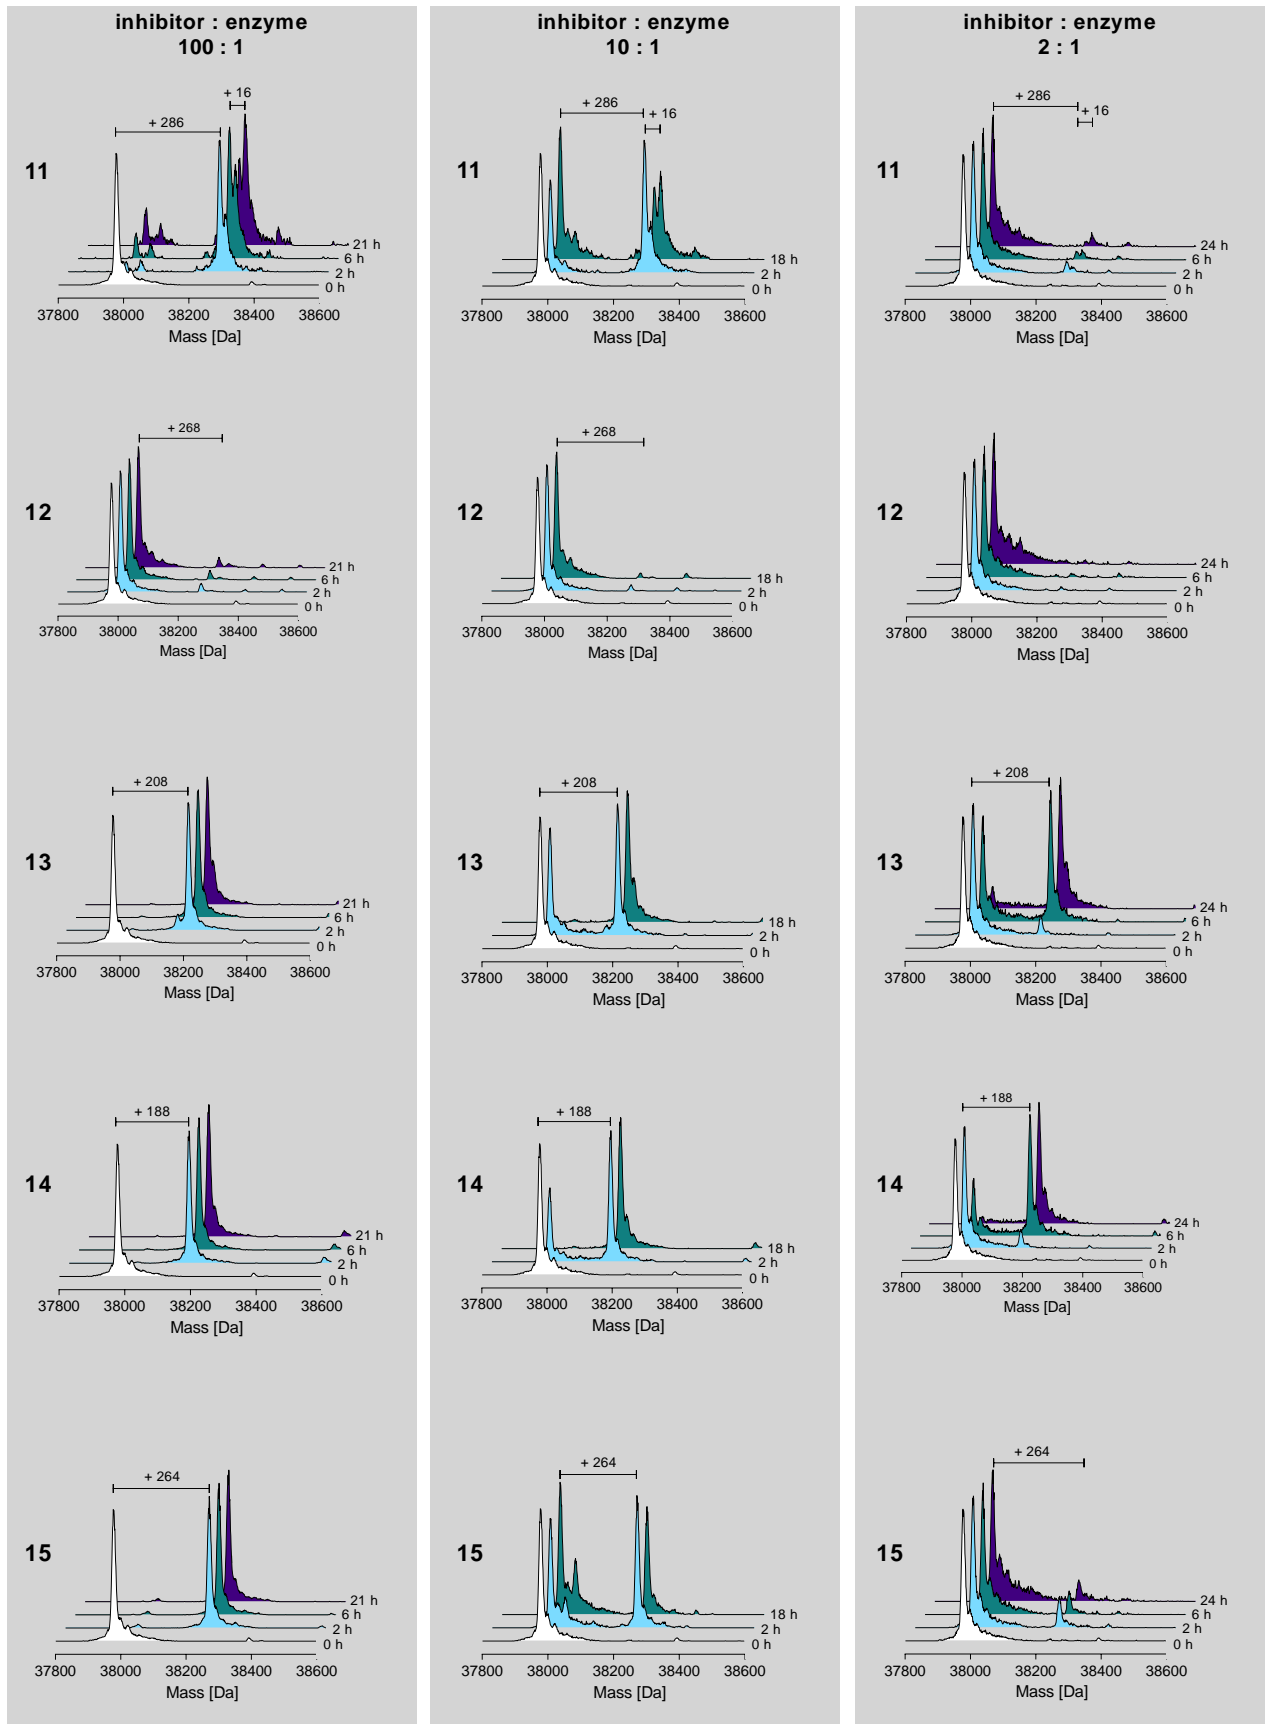

131

132 **Figure S10. Protein observed SPE-MS analysis for the reaction of Ldt<sub>M12</sub> with inhibitors 1-21 (figure**  
 133 **continues).**

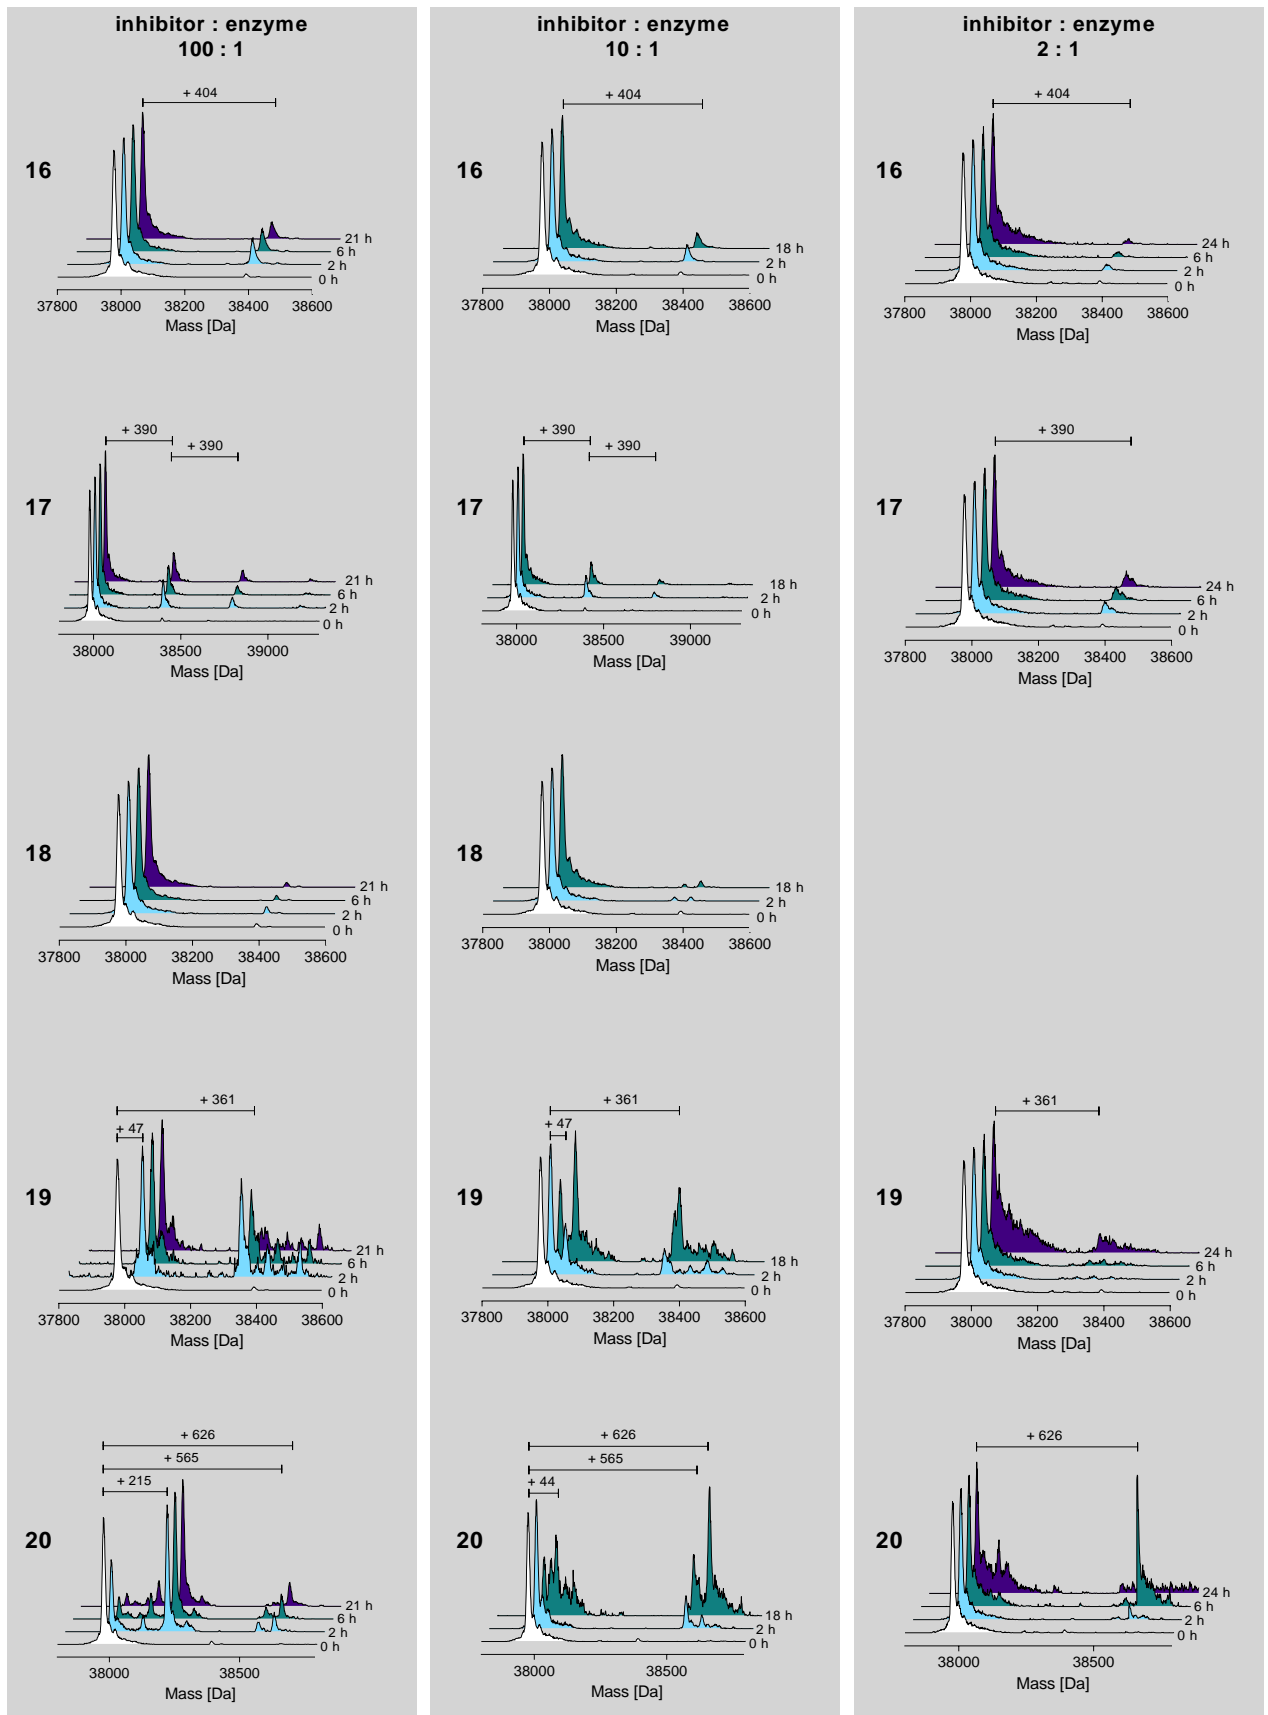

134

135 **Figure S10. Protein observed SPE-MS analysis for the reaction of Ldt<sub>M12</sub> with inhibitors 1-21 (figure**  
 136 **continues).**

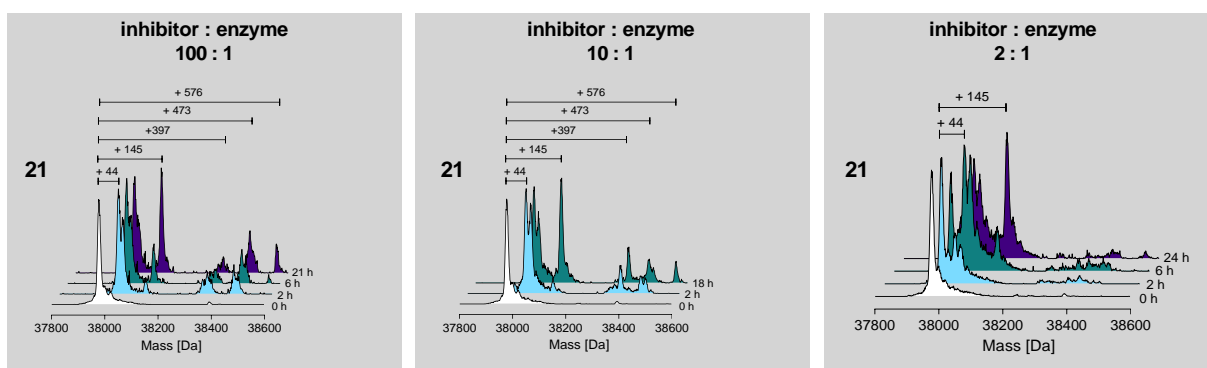

137

138 **Figure S10. Protein observed SPE-MS analysis for the reaction of Ldt<sub>Mt2</sub> with inhibitors 1-21.** 1  $\mu$ M  
 139 Ldt<sub>Mt2</sub> was incubated with the inhibitors at the specified ratio at room temperature in 50 mM Tris, pH  
 140 7.5. Samples were analysed after the indicated times. Compound structures are given in Table S5.  
 141 Deconvoluted spectra, obtained using the maximum entropy algorithm in the MassHunter  
 142 Workstation Qualitative Analysis B.07.00 program (Agilent), are shown.

143

144 **Table S6. Calculated (based on anticipated binding mode) and observed masses (Da) and mass shifts**  
 145 **(Da) for protein observed SPE-MS experiments with Ldt<sub>Mt2</sub> and the indicated inhibitors.** Mass shifts  
 146 are relative to unmodified Ldt<sub>Mt2</sub>. \* Calculated mass for reaction at the inhibitor terminal amide group.  
 147 \*\* Calculated mass for reaction at the inhibitor acrylamide group. Compound structures are given in  
 148 Table S5. Deconvoluted SPE-MS spectra are shown in Figure S10.

| Compound | Calculated mass (Da)             | Observed mass (Da)                                                        |
|----------|----------------------------------|---------------------------------------------------------------------------|
| 1        | 38334 (+347)                     | 38334 (+347)                                                              |
| 2        | 38249 (+262)                     | 38249 (+262)                                                              |
| 3        | 38161 (+174)                     | 38161 (+174)                                                              |
| 4        | 38257 (+270)                     | 38257 (+270)                                                              |
| 5        | 38287 (+300)                     | 38287 (+300), 38303 (+316)                                                |
| 6        | 38276 (+289)                     | 38276 (+289), 38582 (+595),<br>38889 (+902), 39196 (+1209)                |
| 7        | 38219 (+232)                     | 38113 (+126), 38219 (+232),<br>38235 (+248)                               |
| 8        | 38386 (+399)                     | 38386 (+399)                                                              |
| 9        | 38293 (+306)                     | 38309 (+322), 38325 (+338)                                                |
| 10       | 38269 (+282)                     | 38173 (+186), 38285 (+298)                                                |
| 11       | 38257 (+270)                     | 38273 (+286), 38289 (+302)                                                |
| 12       | 38255 (+268)                     | 38255 (+268)                                                              |
| 13       | 38195 (+208)*,<br>38212 (+225)** | 38195 (+208)                                                              |
| 14       | 38175 (+188)*,<br>38191 (+204)** | 38175 (+188)                                                              |
| 15       | 38251 (+264)                     | 38251 (+264)                                                              |
| 16       | 38391 (+404)                     | 38391 (+404)                                                              |
| 17       | 38377 (+390)                     | 38377 (+390), 38767 (+780)                                                |
| 18       | 38353 (+366)                     | 37987 (+0)                                                                |
| 19       | 38465 (+478)                     | 38034 (+47), 38348 (+361)                                                 |
| 20       | 38613 (+626)                     | 38031 (+44), 38202 (+215),<br>38552 (+565), 38613 (+626)                  |
| 21       | 38419 (+432)                     | 38031 (+44), 38132 (+145),<br>38384 (+397), 38460 (+473),<br>38565 (+578) |

149



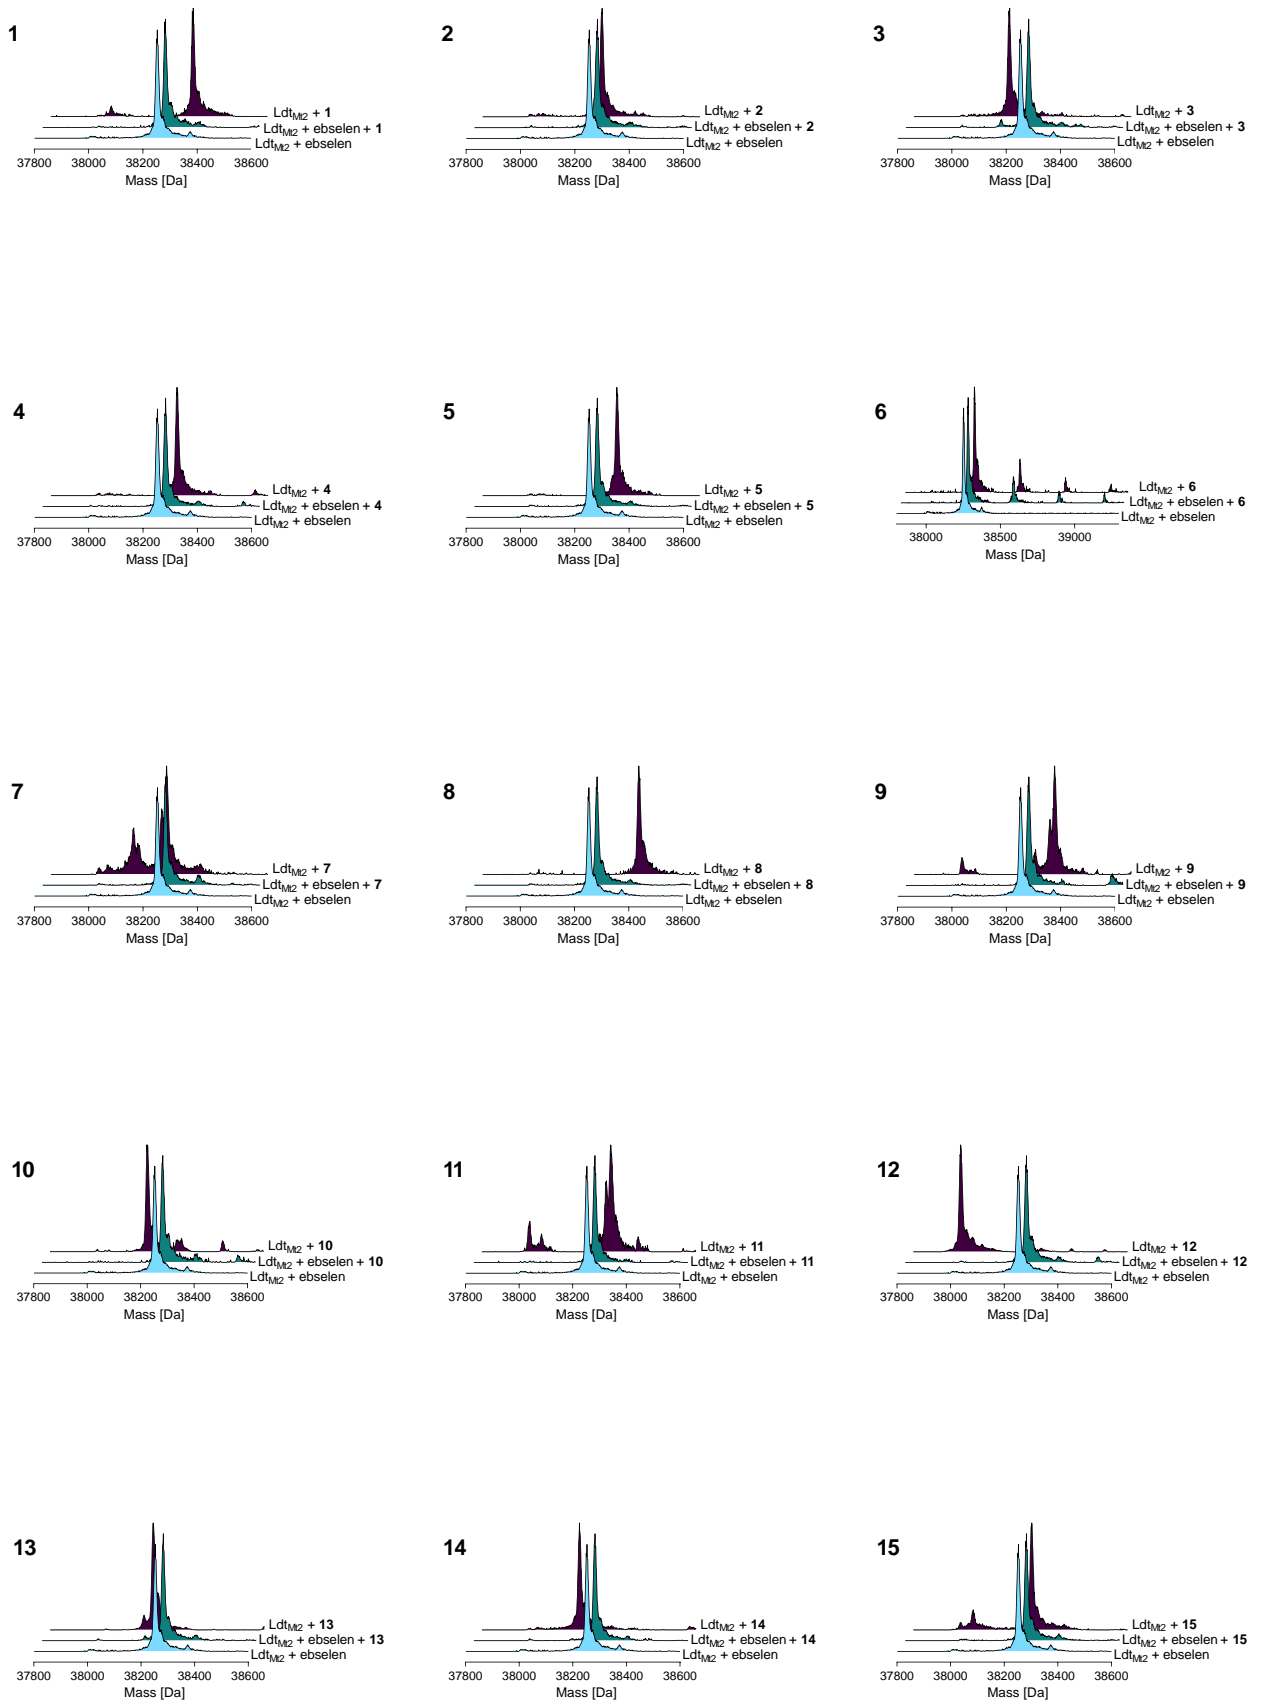

150

151 **Figure S11. Protein observed SPE-MS based active-site selectivity assays (figure continues).**

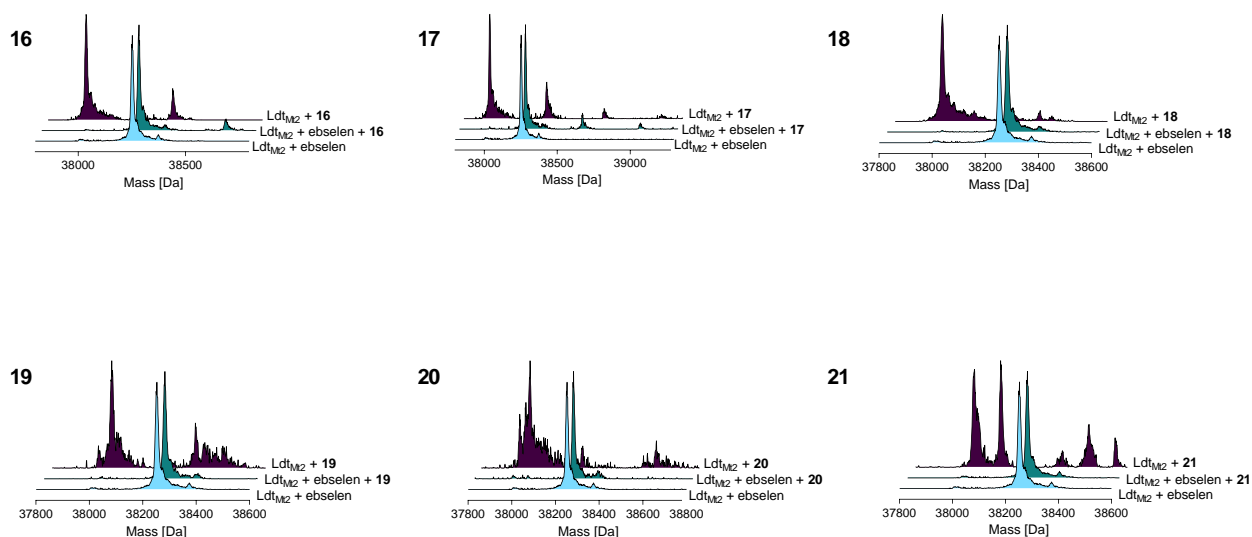

152

153 **Figure S11. Protein observed SPE-MS based active-site selectivity assays.** Ldt<sub>Mt2</sub> (1 μM) was  
 154 preincubated with ebselen (10 μM, a known Ldt<sub>Mt2</sub> inhibitor<sup>3</sup>, which reacts with the nucleophilic  
 155 Cys354) for 1 h in 50 mM Tris, pH 7.5, prior to addition of inhibitors **1-15** (100 μM). Samples were  
 156 analysed after an additional 24 h incubation at room temperature. The spectrum in blue corresponds  
 157 to Ldt<sub>Mt2</sub> reacted with ebselen. The spectrum in green corresponds to Ldt<sub>Mt2</sub> reacted with the specified  
 158 inhibitor, following preincubation with ebselen. The spectrum in purple corresponds to Ldt<sub>Mt2</sub> reacted  
 159 with the specified inhibitor. Deconvoluted spectra, obtained using the maximum entropy algorithm in  
 160 the MassHunter Workstation Qualitative Analysis B.07.00 program (Agilent), are shown.

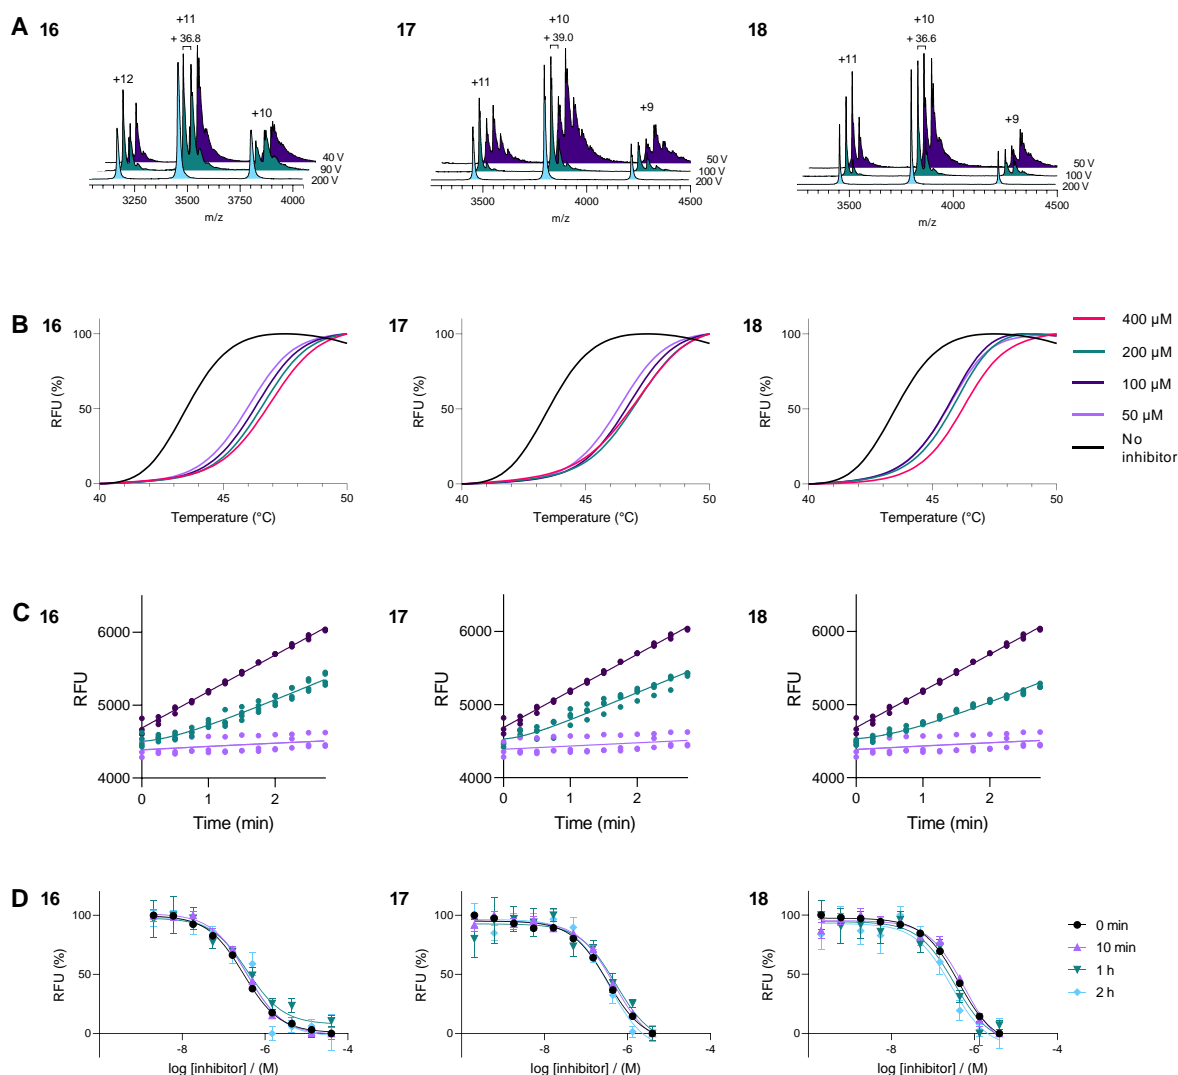

161  
 162 **Figure S12. Characterisation of the inhibition of Ldt<sub>Mt2</sub> by isatins 16-18.** **A.** Non-denaturing MS  
 163 analyses of Ldt<sub>Mt2</sub> reaction with isatins **16**, **17**, and **18**. Ldt<sub>Mt2</sub> (5 μM) was combined with **16**, **17** or **18**  
 164 (500 μM) in 500 mM ammonium acetate. Mass spectra were recorded at cone voltages ranging from  
 165 40 V to 200 V. The mass shifts induced by inhibitor binding are shown for the +11 charge state (**16**) or  
 166 the +10 charge state (**17** and **18**) and correspond to the binding of a single inhibitor molecule. **B.**  
 167 Thermal shift assays with isatins **16-18**. Ldt<sub>Mt2</sub> (5 μM) and the specified inhibitor (500 μM) were  
 168 preincubated for 30 minutes prior to addition of SYPRO Orange (6 x concentrated, according to the  
 169 manufacturer's (Invitrogen) protocol) in 50 mM Tris, pH 7.5. **C.** Jump dilution assays with isatins **16-18**.  
 170 Ldt<sub>Mt2</sub> (10 μM) and the specified inhibitor (100 μM) in 50 mM HEPES, pH 7.2, 0.01% (v/v) Triton X-100  
 171 were incubated for 2 hours at room temperature, then 1000 x diluted and assayed with probe **2** (15  
 172 μM). The results imply that binding of the tested isatin inhibitors is reversible. The *k*<sub>off</sub> and *t*<sub>1/2</sub> values  
 173 are given in Table S7. **D.** Dose-response assays with isatins **16-18** at varying inhibitor pre-incubation  
 174 times. Assays of Ldt<sub>Mt2</sub> were carried out with 300 nM Ldt<sub>Mt2</sub> and 15 μM probe **1** at room temperature  
 175 in 50 mM sodium phosphate pH 7.5 with 0.007% (v/v) Tween-20. Average pIC<sub>50</sub> values are given in  
 176 Table S8.

177

178 **Table S7. Off rate ( $k_{\text{off}}$ ) and half-life ( $t_{1/2}$ ) of isatins 16 – 18 in complex with Ldt<sub>ME2</sub>, as determined by**  
179 **jump dilution assays.**

| <b>Compound</b> | <b><math>k_{\text{off}}</math> (s<sup>-1</sup>)</b> | <b><math>t_{1/2}</math> (min)</b> |
|-----------------|-----------------------------------------------------|-----------------------------------|
| <b>16</b>       | 103 ± 16.5                                          | 0.41 ± 0.17                       |
| <b>17</b>       | 84.6 ± 6.03                                         | 0.49 ± 0.094                      |
| <b>18</b>       | 160 ± 15.5                                          | 0.26 ± 0.17                       |

180

181

182 **Table S8. Dose-response assays with isatins 16-18 at varying inhibitor pre-incubation times.**

| Compound  | pIC <sub>50</sub> |             |             |             |
|-----------|-------------------|-------------|-------------|-------------|
|           | 0 min             | 10 min      | 60 min      | 120 min     |
| <b>16</b> | 6.52 ± 0.06       | 6.44 ± 0.11 | 6.43 ± 0.32 | 6.39 ± 0.37 |
| <b>17</b> | 6.48 ± 0.14       | 6.33 ± 0.14 | 6.28 ± 0.45 | 6.45 ± 0.26 |
| <b>18</b> | 6.39 ± 0.07       | 6.24 ± 0.23 | 6.49 ± 0.35 | 6.56 ± 0.35 |

183

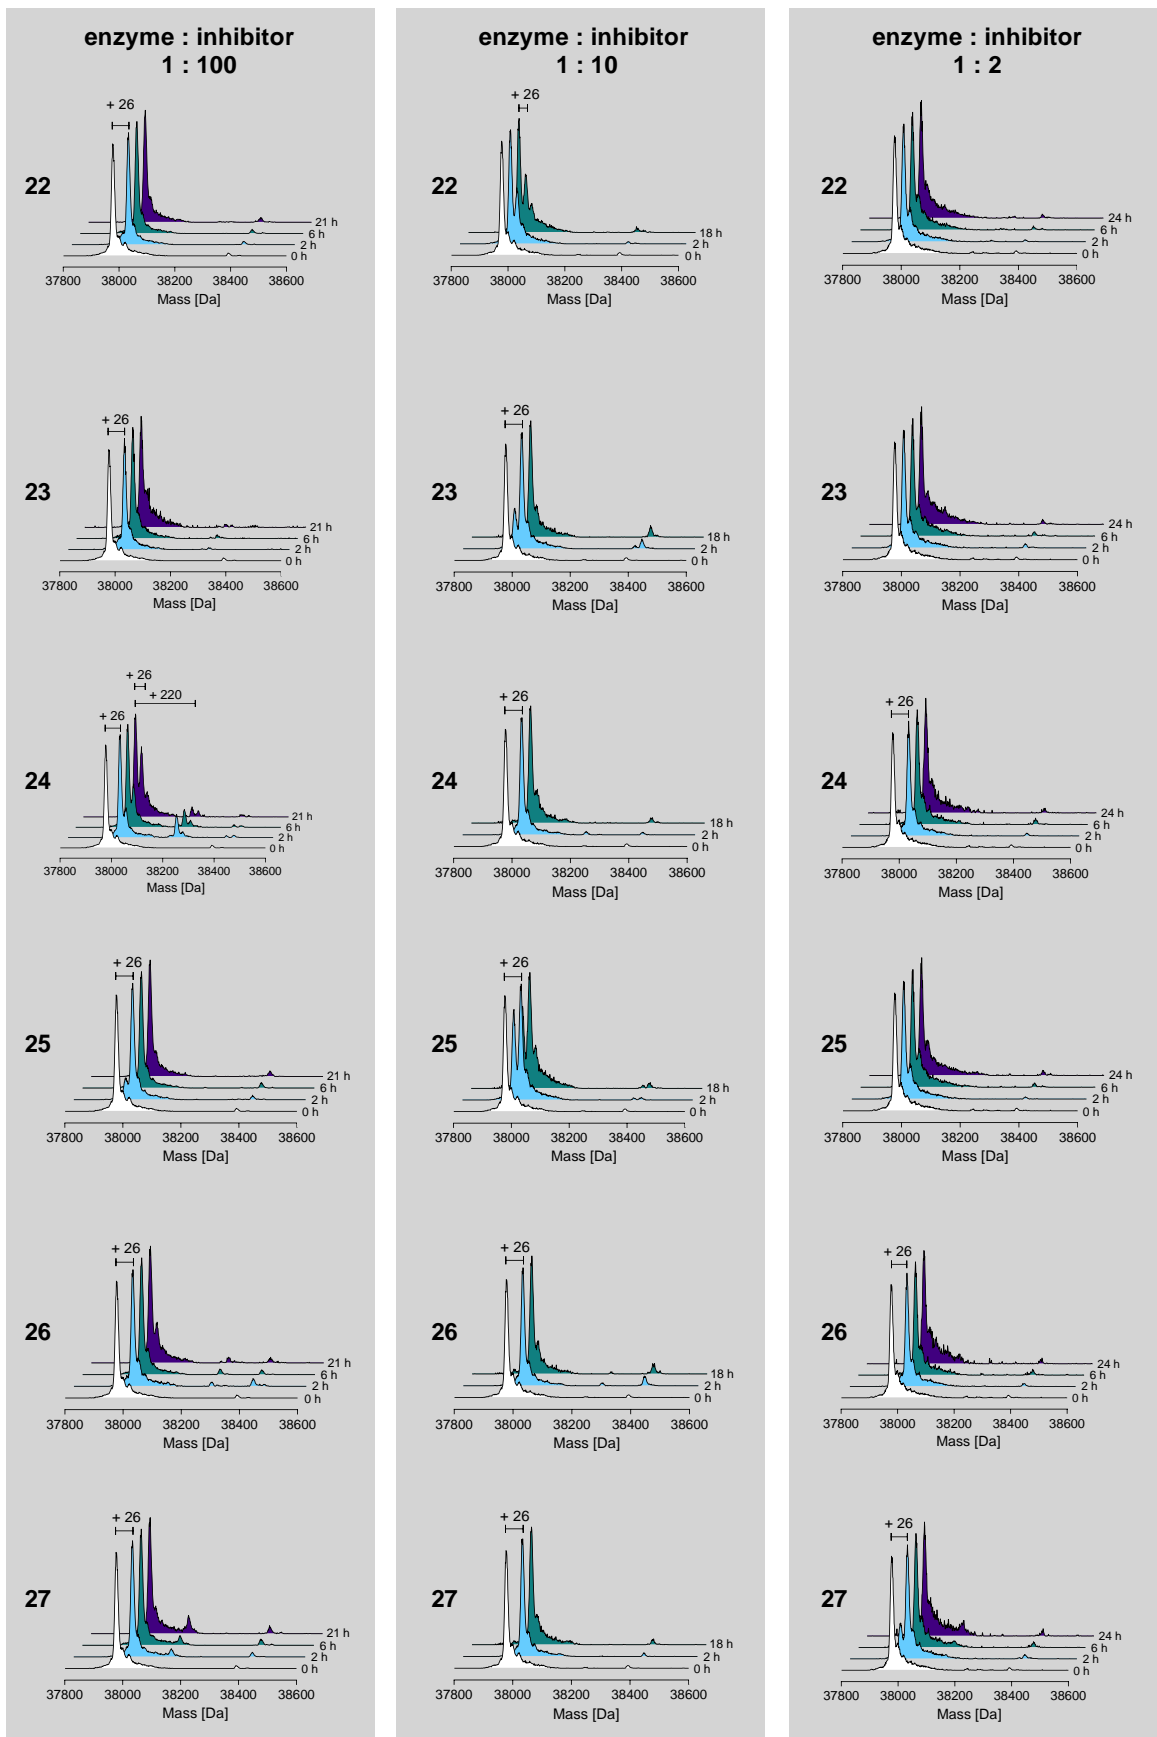

184

185 **Figure S13. Protein observed SPE-MS analysis for the reaction of  $Ldt_{M12}$  with inhibitors 22-39 (figure**  
 186 **continues).**

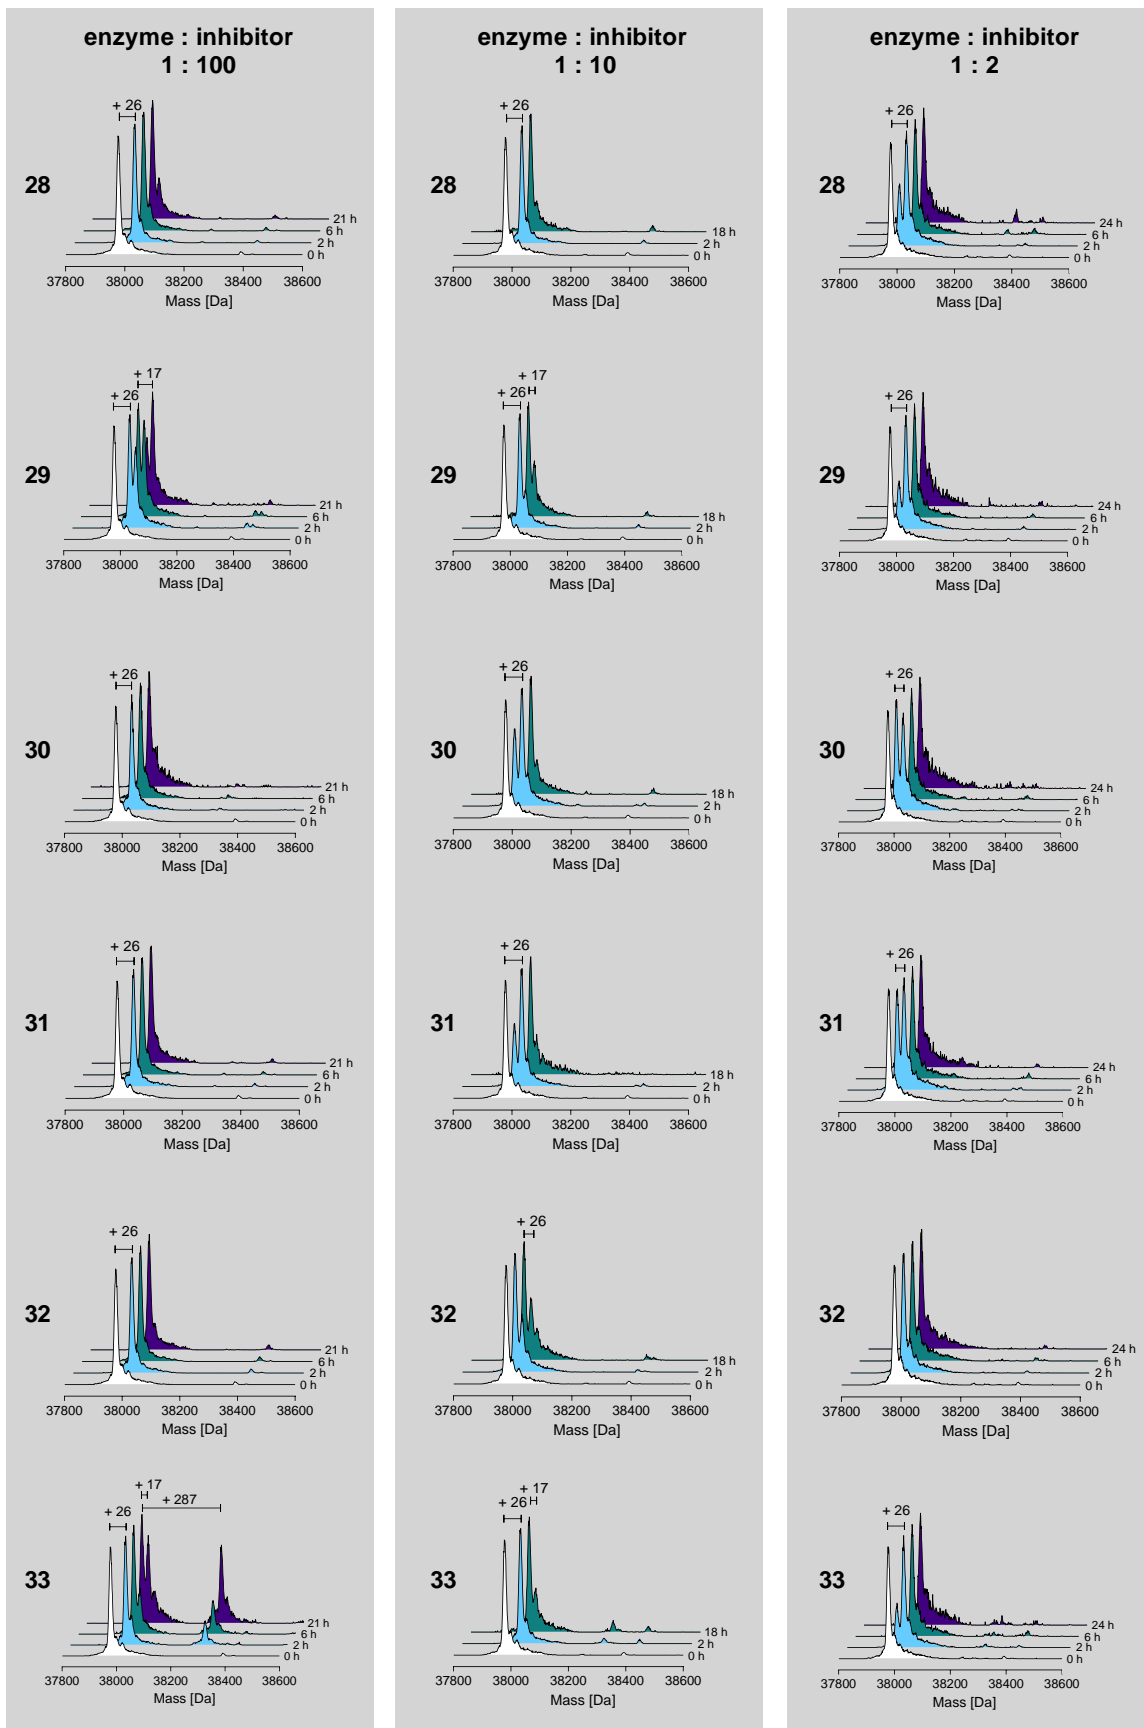

187

188 **Figure S13. Protein observed SPE-MS analysis for the reaction of Ldt<sub>Mt2</sub> with inhibitors 22-39 (figure**  
 189 **continues).**

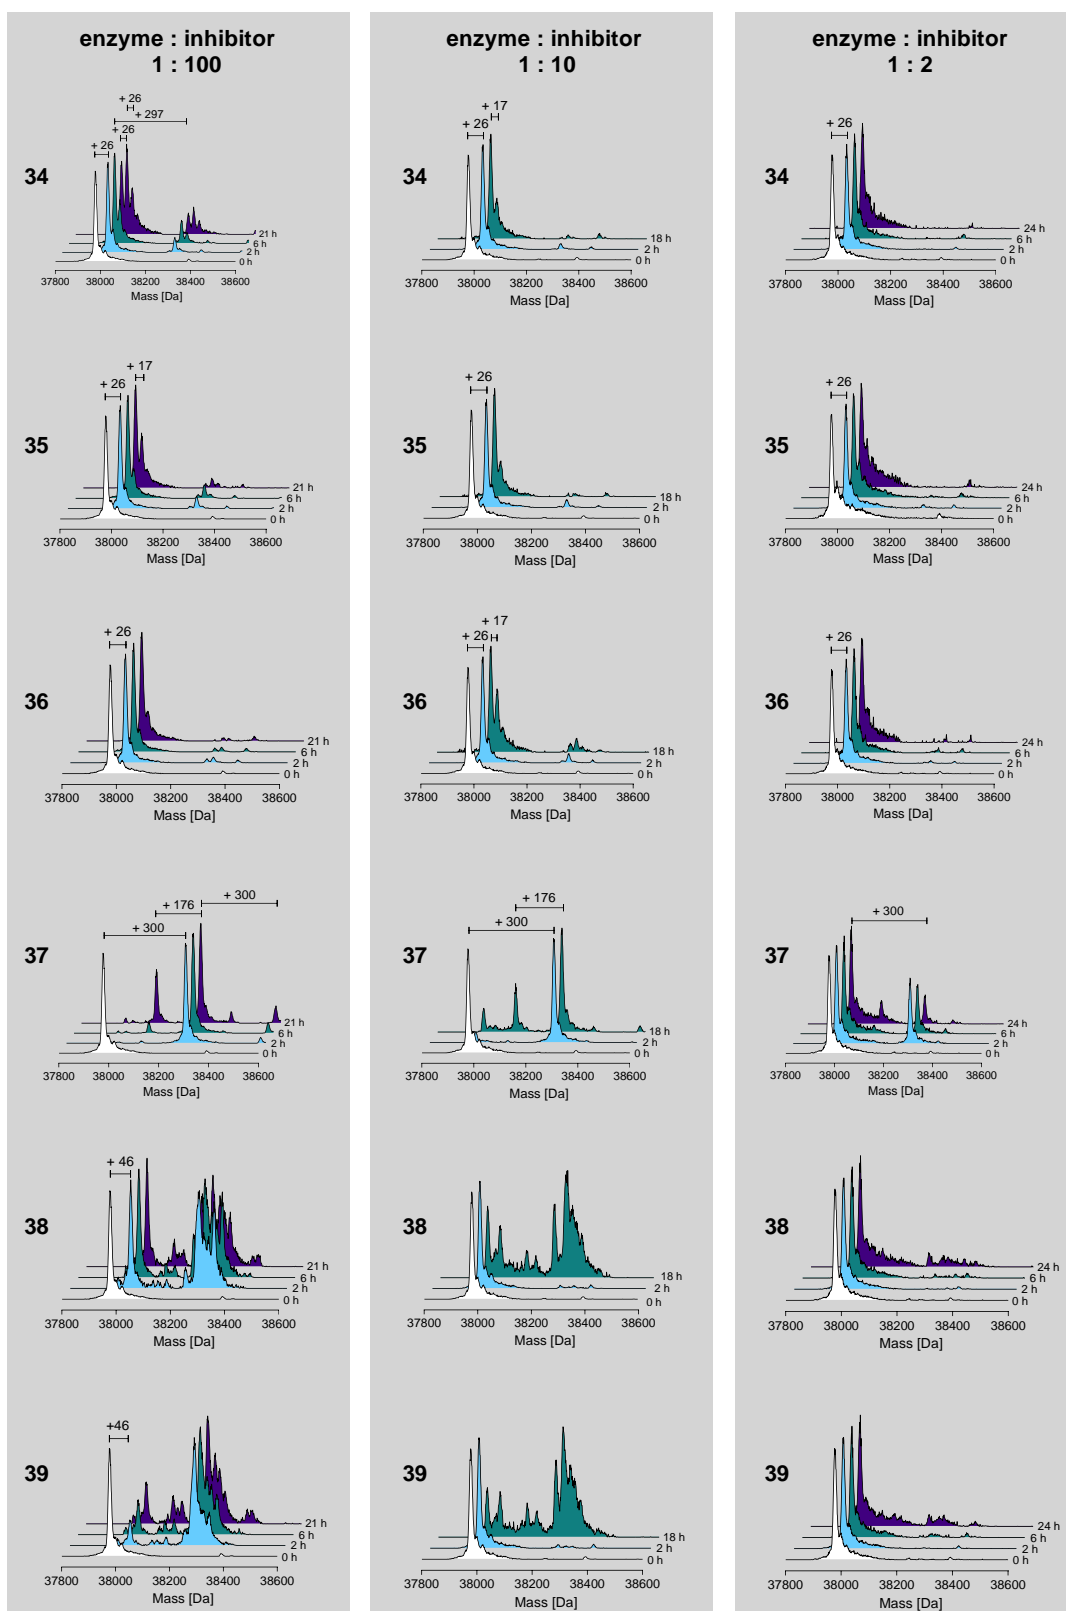

190

191 **Figure S13. Protein observed SPE-MS analysis for the reaction of Ldt<sub>Mt2</sub> with inhibitors 22-39.** 1  $\mu$ M  
 192 Ldt<sub>Mt2</sub> was incubated with the inhibitor at the specified ratio at room temperature in 50 mM Tris, pH  
 193 7.5. Samples were analysed after the indicated times. Compound structures are given in Table S5.  
 194 Deconvoluted spectra, obtained using the maximum entropy algorithm in the MassHunter  
 195 Workstation Qualitative Analysis B.07.00 program (Agilent), are shown.



196 **Table S9. Calculated\* and observed masses (Da) and mass shifts (Da) from protein observed SPE-MS**  
 197 **experiments with Ldt<sub>Mt2</sub> (1 μM) and the indicated nitrile inhibitors.** Mass shifts are relative to  
 198 unmodified Ldt<sub>Mt2</sub>. \*Calculated mass for cyanation of Ldt<sub>Mt2</sub>. \*\*Calculated mass for unfragmented  
 199 adduct formation. \*\*\*Due to complexity of the obtained mass spectra, only major observed peaks are  
 200 provided.

| Compound | Calculated mass (Da)         | Observed mass (Da)                                                                                       |
|----------|------------------------------|----------------------------------------------------------------------------------------------------------|
| 22       | 38004 (+26)*, 38283 (+305)** | 38004 (+26)                                                                                              |
| 23       | 38004 (+26)*, 38283 (+305)** | 38004 (+26)                                                                                              |
| 24       | 38004 (+26)*, 38199 (+221)** | 38004 (+26), 38030 (+52), 38224 (+246)                                                                   |
| 25       | 38004 (+26)*, 38199 (+221)** | 38004 (+26)                                                                                              |
| 26       | 38004 (+26)*, 38249 (+271)** | 38004 (+26)                                                                                              |
| 27       | 38004 (+26)*, 38222 (+244)** | 38004 (+26)                                                                                              |
| 28       | 38004 (+26)*, 38206 (+228)** | 38004 (+26)                                                                                              |
| 29       | 38004 (+26)*, 38280 (+302)** | 38004 (+26), 38022 (+44)                                                                                 |
| 30       | 38004 (+26)*, 38294 (+316)** | 38004 (+26)                                                                                              |
| 31       | 38004 (+26)*, 38281 (+303)** | 38004 (+26)                                                                                              |
| 32       | 38004 (+26)*, 38297 (+319)** | 38004 (+26)                                                                                              |
| 33       | 38004 (+26)*, 38264 (+286)** | 38004 (+26), 38022 (+44), 38291 (+313)                                                                   |
| 34       | 38004 (+26)*, 38275 (+297)** | 38004 (+26), 38030 (+52), 38056 (+78),<br>38301 (+323), 38327 (+349), 38353 (+375)                       |
| 35       | 38004 (+26)*, 38275 (+297)** | 38004 (+26), 38022 (+44)                                                                                 |
| 36       | 38004 (+26)*, 38302 (+324)** | 38004 (+26), 38022 (+44)                                                                                 |
| 37       | 38004 (+26)*, 38278 (+300)** | 38102 (+124), 38278 (+300),<br>38402 (+424), 38578 (+600)                                                |
| 38       | 38319 (+341)**               | 38024 (+46), 38277 (+299),<br>38293 (+315), 38331 (+353)***                                              |
| 39       | 38305 (+327)**               | 38024 (+46), 38125 (+147), 38157 (+179),<br>38252 (+274), 38277 (+299), 38296 (+318),<br>38316 (+338)*** |

201

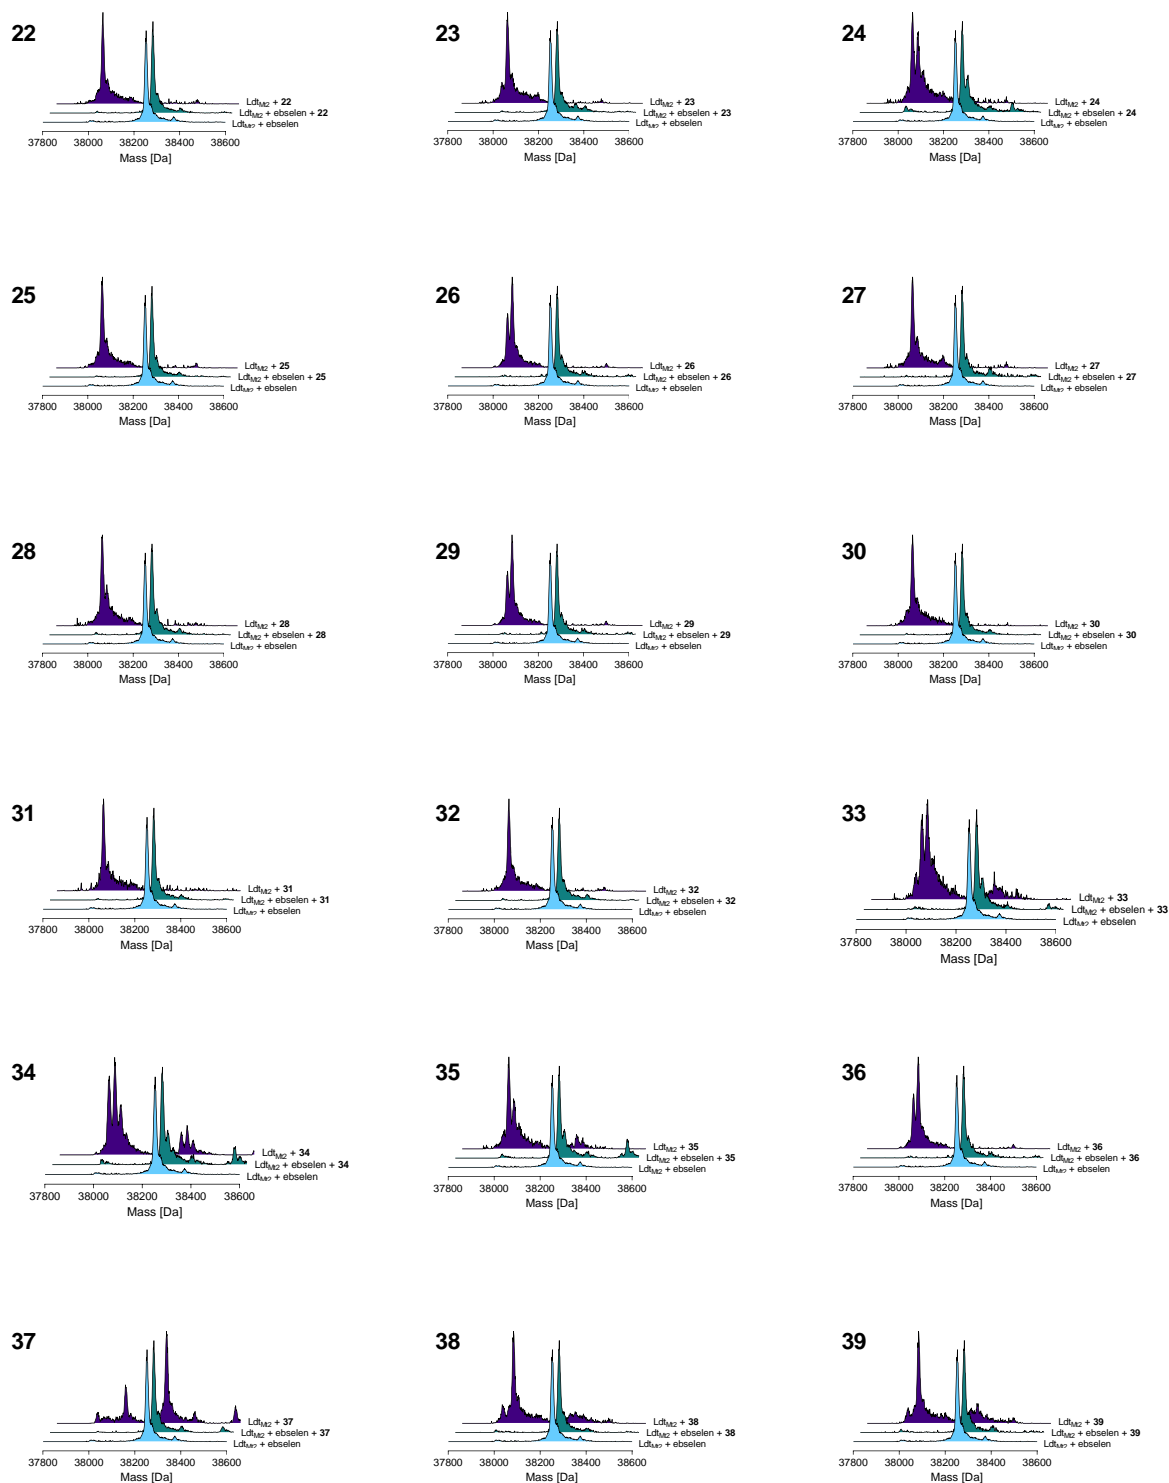

202

203 **Figure S14. Protein observed SPE-MS based active-site selectivity assays with nitriles 22-36.** Ldt<sub>Mt2</sub> (1  
 204  $\mu$ M) was preincubated with ebselen (10  $\mu$ M, a known Ldt<sub>Mt2</sub> inhibitor<sup>3</sup>, which reacts with the  
 205 nucleophilic Cys354) for 1 h in 50 mM Tris, pH 7.5, prior to addition of inhibitors **22-36** (100  $\mu$ M).  
 206 Samples were analysed after an additional 24 h incubation at room temperature. The spectrum in blue  
 207 corresponds to Ldt<sub>Mt2</sub> in complex with ebselen. The spectrum in green corresponds to Ldt<sub>Mt2</sub> and the  
 208 specified inhibitor upon preincubation with ebselen. The spectrum in purple corresponds to Ldt<sub>Mt2</sub> in  
 209 complex with the specified inhibitor. Deconvoluted spectra, obtained using the maximum entropy  
 210 algorithm in the MassHunter Workstation Qualitative Analysis B.07.00 program (Agilent), are shown.

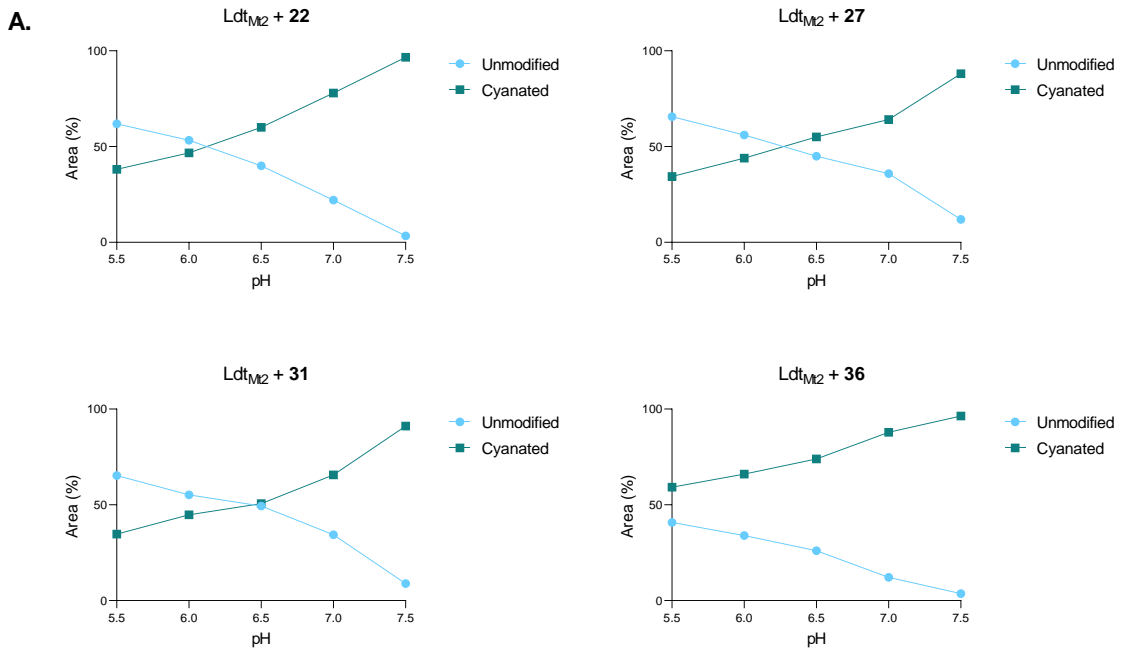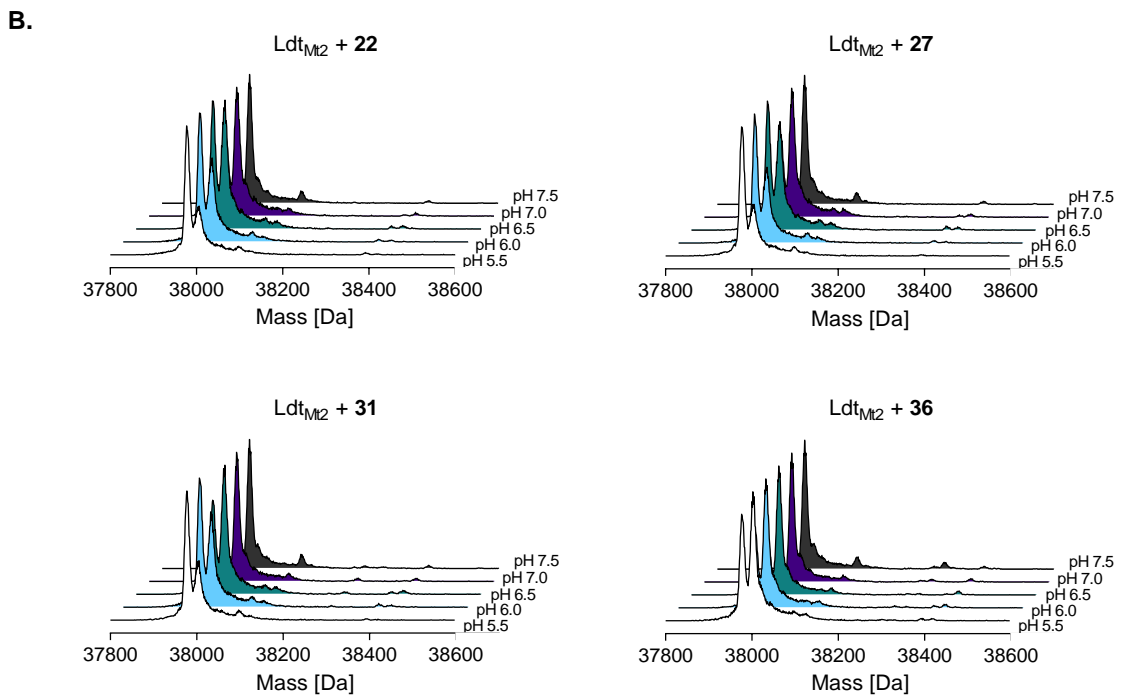

211

212 **Figure S15. pH dependence of the cyanation of  $Ldt_{Mt2}$  by representative cyanamides 22, 27, 31 and**  
 213 **36. MS spectra were taken 15 min after addition of the nitrile (10  $\mu$ M) to  $Ldt_{Mt2}$  (1  $\mu$ M) in 50 mM Tris,**  
 214 **pH 7.5. (A) Area of cyanated and unmodified  $Ldt_{Mt2}$  peaks at the specified pH. (B) MS spectra of  $Ldt_{Mt2}$**   
 215 **following reaction with selected cyanamides at the specified pH values.**

216

217 **Table S10. Inhibition of Ldt<sub>MT2</sub> by known cyanating compounds.**<sup>4,5</sup> MW: Molecular weight. *k*<sub>chem</sub>:  
 218 apparent intrinsic thiol reactivity as measured with *L*-glutathione and probe **2**.

|              | Structure                                                                          | MW     | pIC <sub>50</sub> Ldt <sub>MT2</sub> | <i>k</i> <sub>chem</sub> |
|--------------|------------------------------------------------------------------------------------|--------|--------------------------------------|--------------------------|
| 40           | 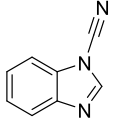  | 143.15 | 6.31 ± 0.03                          | 0.90 ± 0.05              |
| 41           |   | 93.09  | 6.54 ± 0.01                          | 3.69 ± 0.11              |
| 42           |   | 144.14 | 6.02 ± 0.05                          | 0.90 ± 0.08              |
| 43<br>(CDAP) |   | 234.99 | 5.30 ± 0.08                          | N.D.                     |
| 44<br>(NTCB) |   | 224.19 | 5.84 ± 0.04                          | N.D.                     |
| 45<br>(CDTP) |  | 359.34 | <4.4                                 | N.D.                     |

219

220

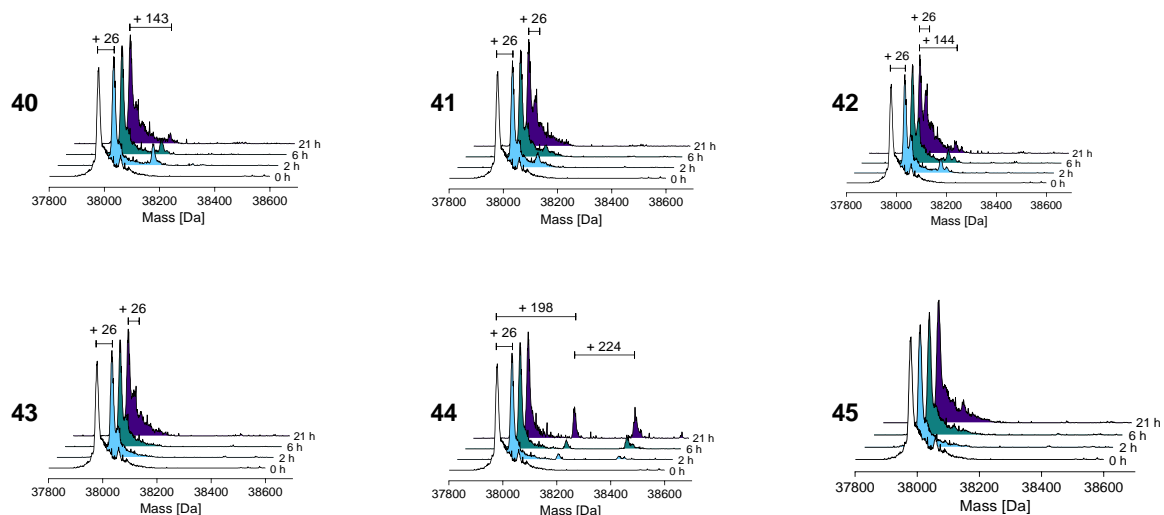

221

222 **Figure S16. Protein observed SPE-MS analysis for the reaction of Ldt<sub>Mt2</sub> with cyanating agents 40-45.**  
 223 1  $\mu\text{M}$  Ldt<sub>Mt2</sub> was incubated with 100  $\mu\text{M}$  cyanating agent at room temperature in 50 mM Tris, pH 7.5.  
 224 Samples were analysed after the indicated times. Compound structures are given in Table S10.  
 225 Deconvoluted spectra, obtained using the maximum entropy algorithm in the MassHunter  
 226 Workstation Qualitative Analysis B.07.00 program (Agilent), are shown.

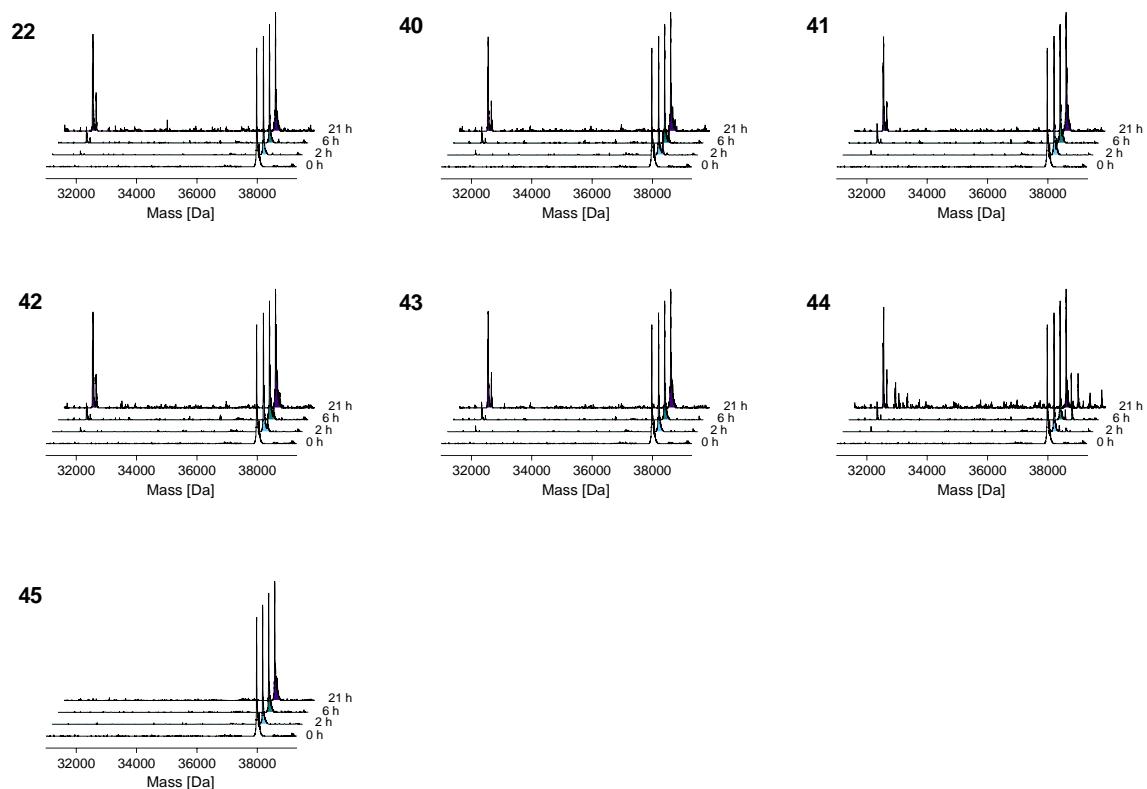

227

228 **Figure S17. Protein observed SPE-MS analysis of the reaction of Ldt<sub>Mt2</sub> with 22 (a representative of**  
 229 **cyanamides 22-36) and 40-45, showing evidence for cleavage of Ldt<sub>Mt2</sub> at Cys354 after prolonged**  
 230 **incubation for 22 and 40-44.** 1 μM Ldt<sub>Mt2</sub> was incubated with the inhibitor at a 1 to 100 ratio at room  
 231 temperature in 50 mM Tris, pH 7.5. Samples were analysed after the indicated times. Compound  
 232 structures are given in Table S5 and Table S9. Deconvoluted spectra, obtained using the maximum  
 233 entropy algorithm in the MassHunter Workstation Qualitative Analysis B.07.00 program (Agilent), are  
 234 shown. Note, cleavage was not observed in the case of compound 45.

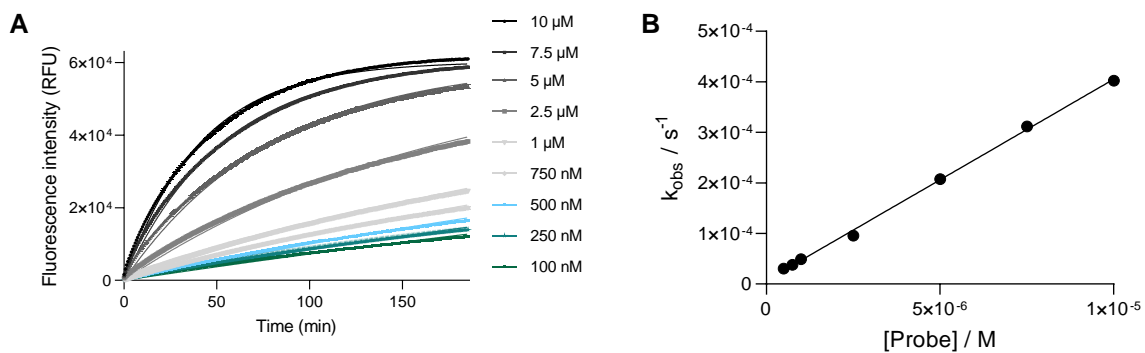

235

236 **Figure S18. Assay set up for the determination of the second-order rate constant  $k_{inact}/K_i$  for**  
 237 **irreversible inactivation of  $Ldt_{Mt2}$  via an endpoint assay using irreversibly reacting Probe 2. A.**  
 238 **Determination of the observed kinetic rate constant ( $k_{obs}$ ). Assays were carried out using 100 nM  $Ldt_{Mt2}$**   
 239 **at room temperature in 50 mM HEPES, pH 7.2 with 0.01% (v/v) Triton X-100, using varying Probe 2**  
 240 **concentrations, as specified. B. The obtained  $k_{obs}$  values at various Probe 2 concentrations were used**  
 241 **to provide the  $(k_{inact}/K_i)_{probe}$  value.**

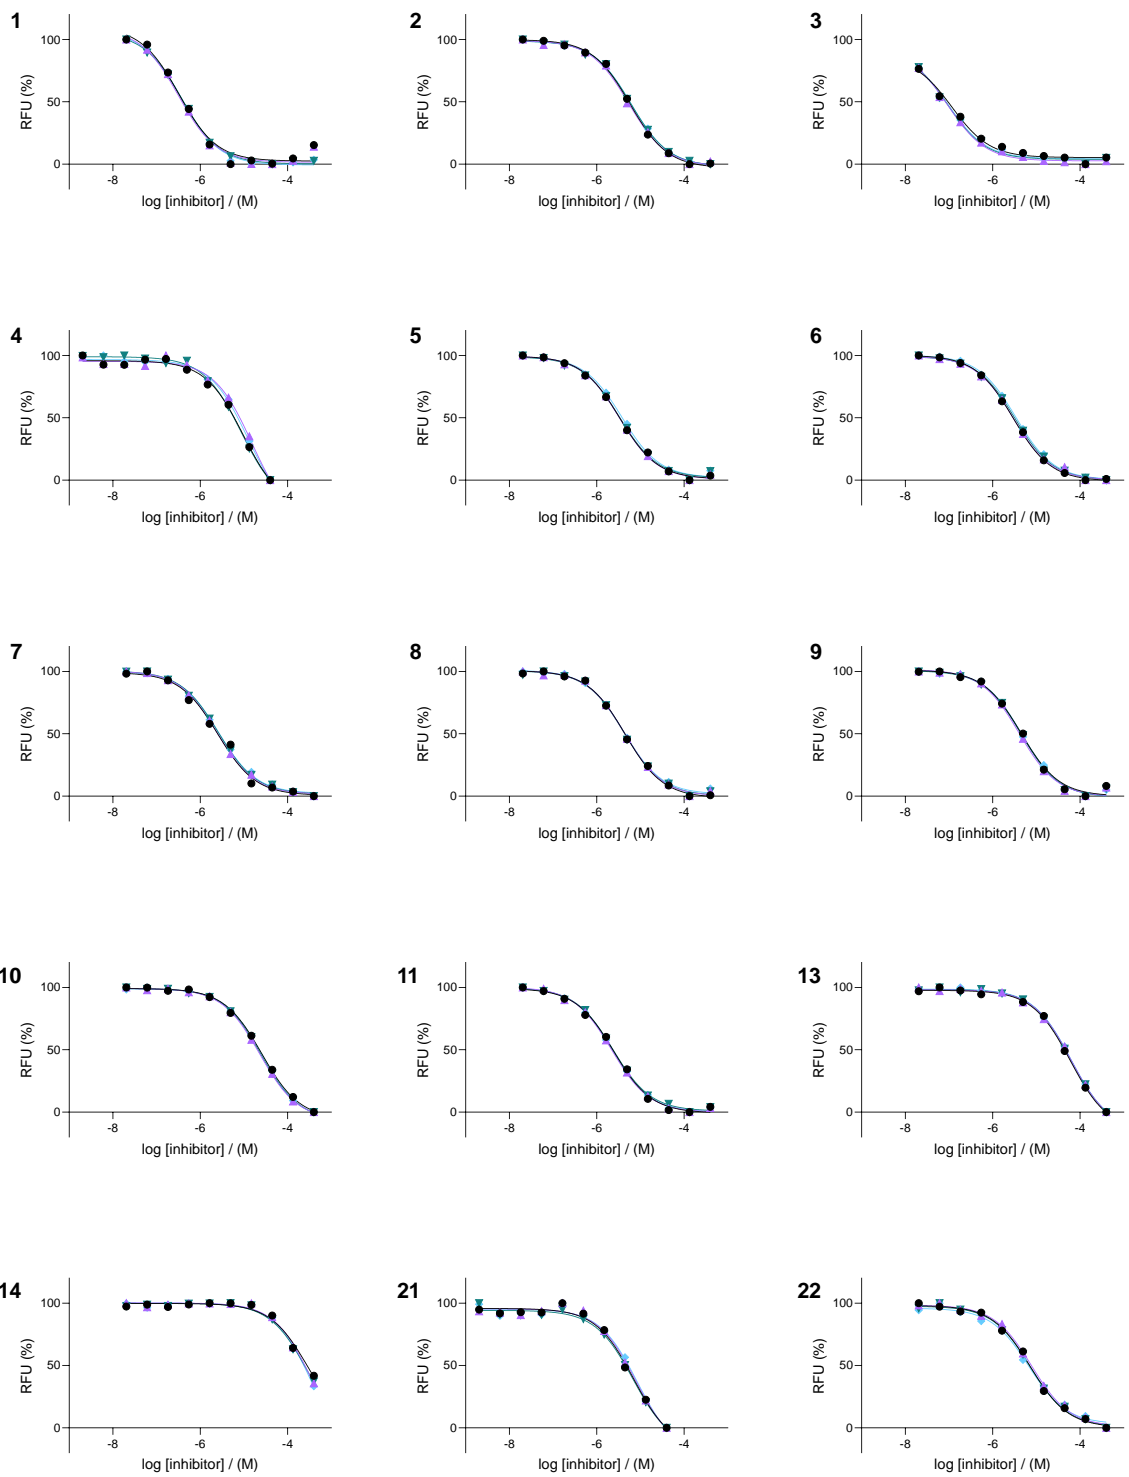

242

243 **Figure S19. Determination of the second-order rate constant for covalent target inactivation**  
 244 **( $k_{\text{inact}}/K_i$ ) of covalent inhibitors 1-11, 13-14 and 21-37 (figure continues).**



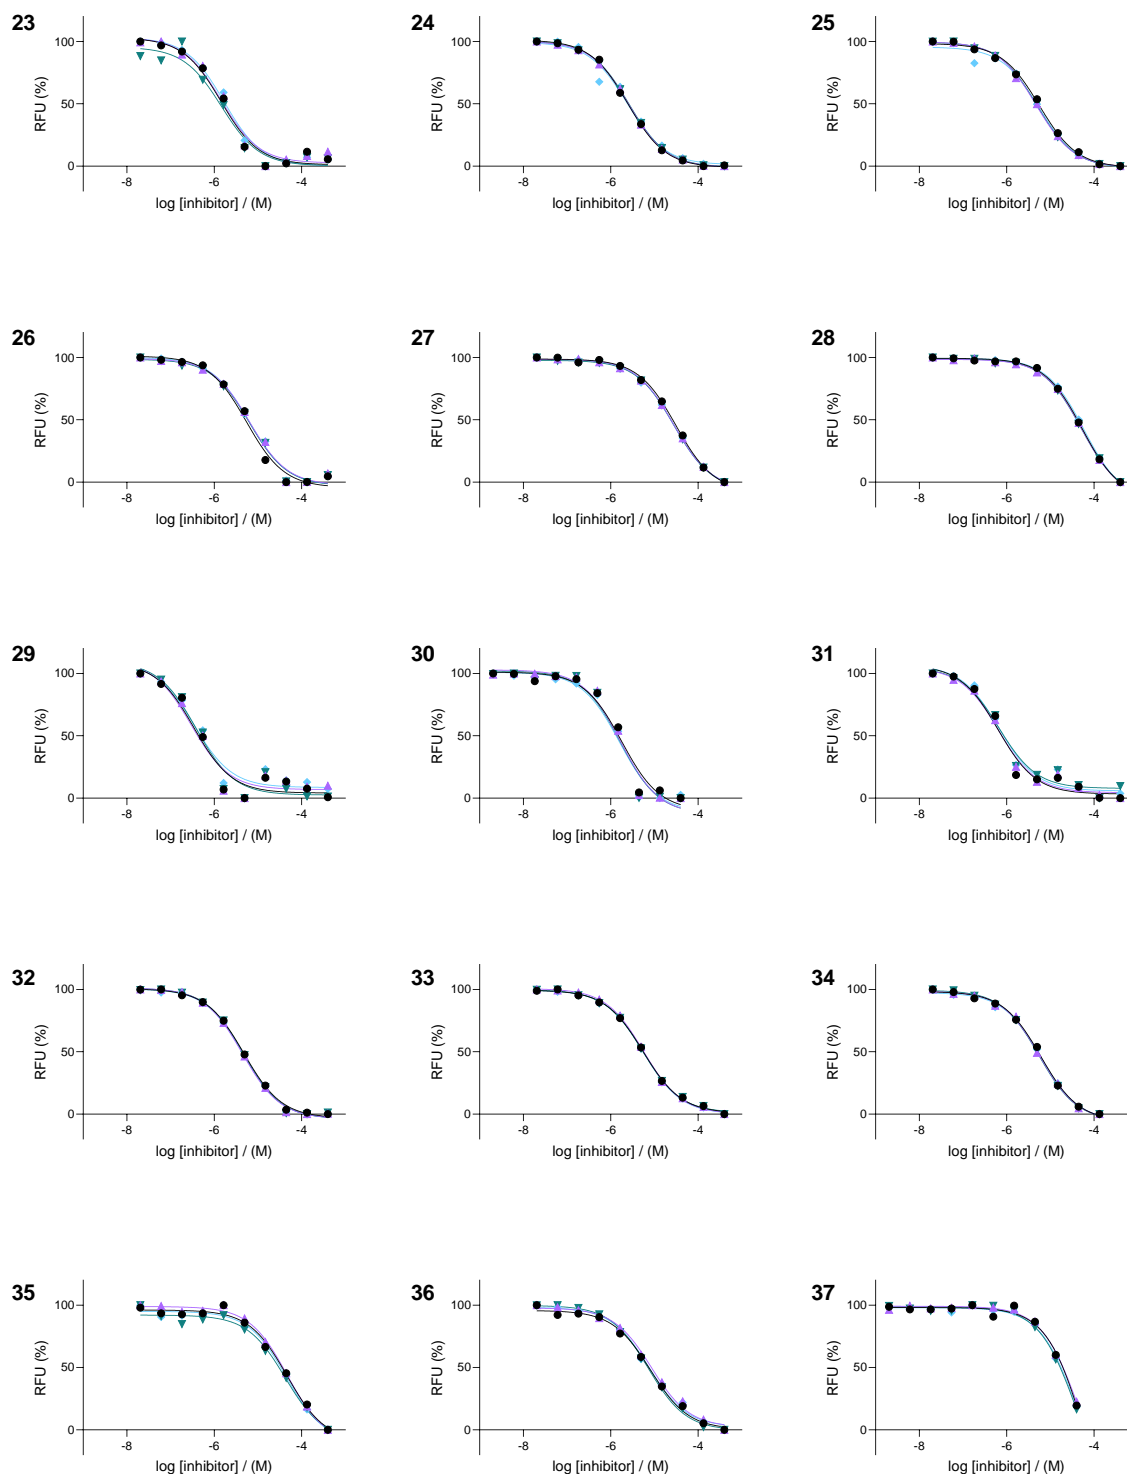

245

246 **Figure S19. Determination of the second-order rate constant for covalent target inactivation**  
 247 **( $k_{\text{inact}}/K_i$ ) of covalent inhibitors 1-11, 13-14 and 21-37.** Inhibition assays were carried out using 100 nM  
 248 Ldt<sub>Mt2</sub> and 10  $\mu$ M Probe 2 with 3 h incubation at rt in 50 mM HEPES, pH 7.2 with 0.01% (v/v) Triton X-  
 249 100. Data points represent values of independent repeats (n=4). Average ( $k_{\text{inact}}/K_i$ )<sub>inhibitor</sub> values and  
 250 compound structures are given in Table S5.

251

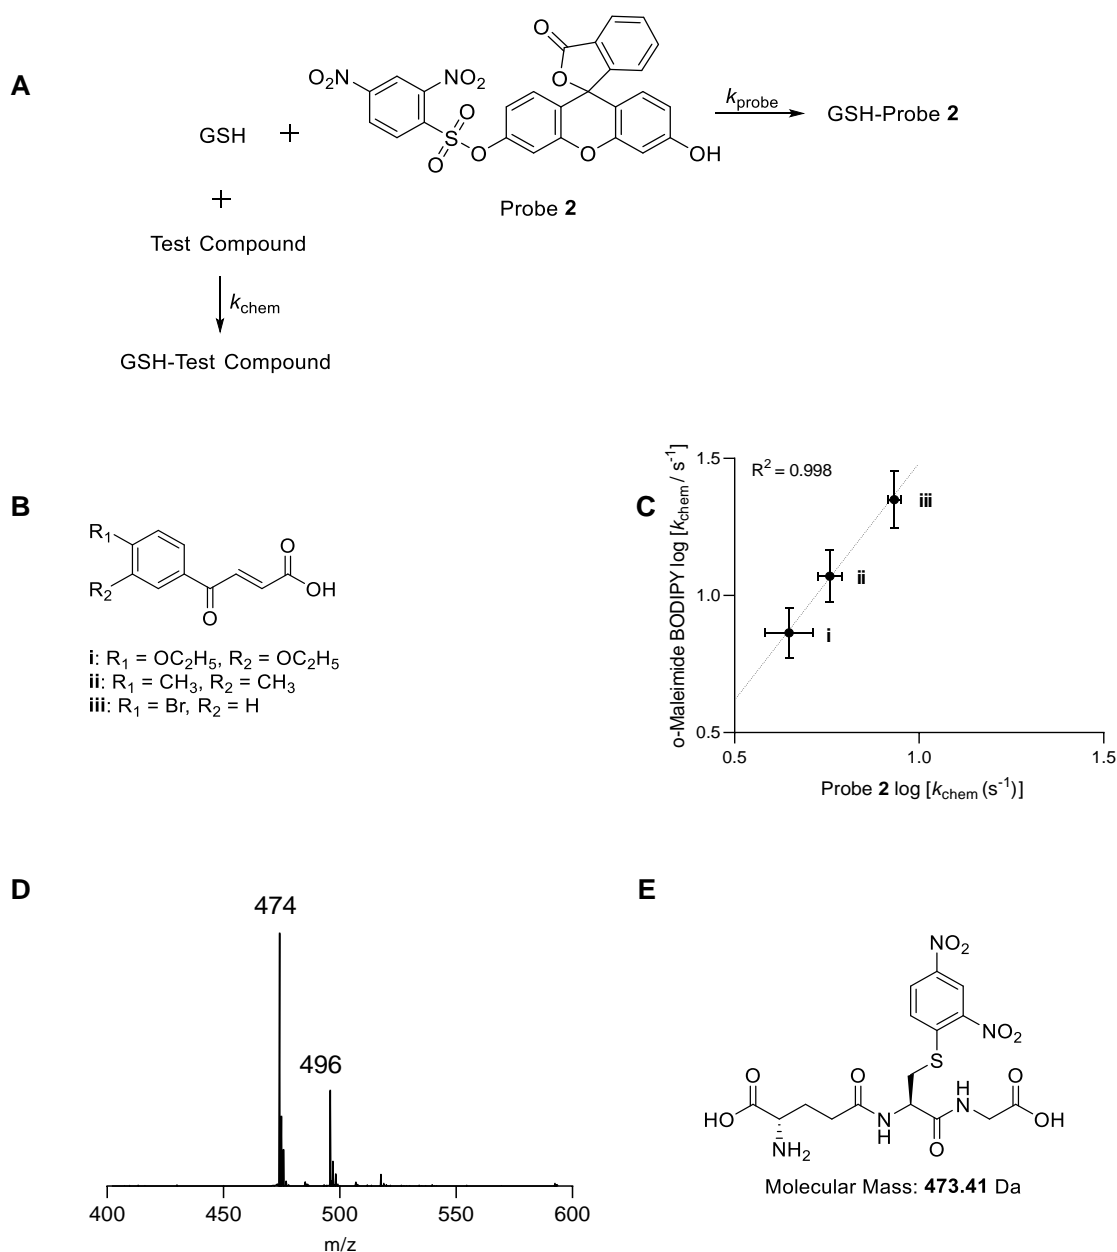

252

253 **Figure S20. Analysis of the intrinsic thiol reactivity ( $k_{\text{chem}}$ ) assay. (A)** The assay measures competition  
 254 between glutathione (GSH) and test compounds for reaction with probe **2**. **(B)** Compounds **i-iii** used  
 255 for validation of the  $k_{\text{chem}}$  assay. **(C)**  $k_{\text{chem}}$  of **i-iii** obtained from the fluorogenic assay with probe **2** versus  
 256 the  $k_{\text{chem}}$  values reported from the fluorogenic assay with *o*-maleimide BODIPY.<sup>6</sup> **(D)** GSH reacts  
 257 covalently and irreversibly with probe **2** under the tested conditions. GSH (2  $\mu\text{M}$ ) was incubated with  
 258 probe **2** (200  $\mu\text{M}$ ) for 16 hours in 50 mM tris, pH 7.5, prior to addition of *N*-ethylmaleimide (2 mM) and  
 259 incubation of an additional 24 h. Only the mass of GSH modified with probe **2** ( $[\text{M}+\text{H}]^+$  474,  $[\text{M}+\text{Na}]^+$   
 260 496) was observed. **(E)** Structure and molecular mass of the anticipated product from the reaction of  
 261 GSH and probe **2**.

262 **Table S11.**  $k_{\text{chem}}$  of i-iii obtained from the fluorogenic assay with probe 2 versus the  $k_{\text{chem}}$  values  
263 reported from the fluorogenic assay with *o*-maleimide BODIPY.<sup>6</sup>

| Compound | $\log(k_{\text{chem}})$ probe 2<br>(mean $\pm$ SD) | $\log(k_{\text{chem}})$ <i>o</i> -maleimide<br>BODIPY (mean $\pm$ SD) |
|----------|----------------------------------------------------|-----------------------------------------------------------------------|
| i        | 0.65 $\pm$ 0.06                                    | 0.86 $\pm$ 0.09                                                       |
| ii       | 0.76 $\pm$ 0.03                                    | 1.07 $\pm$ 0.09                                                       |
| iii      | 0.93 $\pm$ 0.02                                    | 1.34 $\pm$ 0.10                                                       |

264

265

266 **Table S12. Inhibitory activity of selected hit compounds against *M. tuberculosis* and cytotoxicity in**  
 267 **HepG2 cells.** MIC<sub>50</sub> intracellular values represent the concentration of inhibitor that inhibited *M.*  
 268 *tuberculosis* (strain H37Rv) growth in THP1 cells by 50%, as obtained from extrapolation of the dose-  
 269 response curve. MIC<sub>50</sub> extracellular values represent the concentration of inhibitor that inhibited *M.*  
 270 *tuberculosis* (strain H37Rv) growth by 50%, as obtained from extrapolation of the dose-response curve.

|    | Structure | MIC <sub>50</sub> intracellular (μM) | MIC <sub>50</sub> extracellular (μM) | HepG2 IC <sub>50</sub> (μM) |
|----|-----------|--------------------------------------|--------------------------------------|-----------------------------|
| 1  |           | 35.5 ± 4.9                           | >100                                 | N.D.                        |
| 5  |           | 25.7 ± 0.30                          | >100                                 | 2.51 ± 0.12                 |
| 7  |           | 39.8 ± 0.0                           | >100                                 | 3.90 ± 0.88                 |
| 15 |           | 7.08 ± 0.16                          | >100                                 | 9.55 ± 0.22                 |
| 17 |           | 15.1 ± 0.70                          | >100                                 | 53.5 ± 6.7                  |
| 18 |           | 35.5 ± 5.4                           | >100                                 | 42.3 ± 3.4                  |
| 20 |           | 38.9 ± 1.8                           | >100                                 | >100                        |
| 23 |           | 12.0 ± 1.5                           | >100                                 | 28.8 ± 0.0                  |

|    | Structure | MIC <sub>50</sub> intracellular<br>( $\mu\text{M}$ ) | MIC <sub>50</sub> extracellular<br>( $\mu\text{M}$ ) | HepG2 IC <sub>50</sub><br>( $\mu\text{M}$ ) |
|----|-----------|------------------------------------------------------|------------------------------------------------------|---------------------------------------------|
| 30 |           | 0.98 $\pm$ 1.2                                       | >100                                                 | 3.98 $\pm$ 0.10                             |
| 36 |           | 29.5 $\pm$ 0.0                                       | >100                                                 | 32.7 $\pm$ 0.38                             |
| 39 |           | 28.8 $\pm$ 0.0                                       | >100                                                 | >100                                        |

271

272

**Table S13. Data collection and refinement statistics for Ldt<sub>Mt2</sub> inhibitor crystal structures.**

| Datasets                                            | Ldt <sub>Mt2</sub> – 2 (PDB: 8A1L) | Ldt <sub>Mt2</sub> – 3 (PDB: 8A1J) | Ldt <sub>Mt2</sub> – 4 (PDB: 8A1M) |
|-----------------------------------------------------|------------------------------------|------------------------------------|------------------------------------|
| <b>Data Collection</b>                              |                                    |                                    |                                    |
| Beamline (Wavelength, Å)                            | DLS I03 (0.9763)                   | DLS I03 (0.9763)                   | DLS I03 (0.9763)                   |
| Detector                                            | Eiger2 XE 16M                      | Eiger2 XE 16M                      | Eiger2 XE 16M                      |
| Data Processing                                     | Xia2 dials                         | Xia2 3dii                          | Xia2 3dii                          |
| Space group                                         | <i>P</i> 1 2 <sub>1</sub> 1        | <i>P</i> 1 2 <sub>1</sub> 1        | <i>P</i> 1 2 <sub>1</sub> 1        |
| Cell dimensions                                     |                                    |                                    |                                    |
| <i>a, b, c</i> (Å)                                  | 61.76, 94.77, 75.74                | 61.19, 94.02, 75.29                | 61.70, 95.07, 75.45                |
| $\alpha, \beta, \gamma$ (°)                         | 90.00, 92.90, 90.00                | 90.00, 92.61, 90.00                | 90.00, 92.22, 90.00                |
| No. of molecules/ASU                                | 2                                  | 2                                  | 2                                  |
| No. reflections                                     | 38420 (1817)*                      | 27561 (1234)*                      | 38184 (1886)*                      |
| Resolution (Å)                                      | 61.68-2.30 (2.34-2.30)*            | 47.01-2.54 (2.58-2.54)*            | 48.66-2.30 (2.34-2.30)*            |
| <i>R</i> <sub>merge</sub> (I)                       | 0.162 (1.331)*                     | 0.237 (1.859)*                     | 0.131 (1.291)*                     |
| <i>I</i> / $\sigma$ <i>I</i>                        | 9.8 (1.0)*                         | 7.4 (1.0)*                         | 9.6 (1.4)*                         |
| CC-1/2                                              | 1.0 (0.8)*                         | 1.0 (0.6)*                         | 1.0 (0.6)*                         |
| Completeness (%)                                    | 99.6 (96.1)*                       | 97.9 (89.7)*                       | 98.5 (98.7)*                       |
| Multiplicity                                        | 6.9 (7.2)*                         | 6.8 (5.8)*                         | 6.9 (6.8)*                         |
| Wilson B value (Å <sup>2</sup> )                    | 33.84                              | 31.08                              | 40.55                              |
| <b>Refinement</b>                                   |                                    |                                    |                                    |
| <i>R</i> <sub>work</sub> / <i>R</i> <sub>free</sub> | 0.2146/0.2476                      | 0.2346/0.2663                      | 0.2179/0.2501                      |
| No. atoms                                           | 5775                               | 5616                               | 5782                               |
| - Enzyme                                            | 5276                               | 5231                               | 5319                               |
| - Ligand                                            | 76                                 | 46                                 | 81                                 |
| - Water                                             | 423                                | 339                                | 382                                |
| Average B-factors                                   | 47.06                              | 52.20                              | 53.20                              |
| - Enzyme                                            | 46.99                              | 52.46                              | 53.17                              |
| - Ligand                                            | 55.35                              | 58.79                              | 66.73                              |
| - Water                                             | 46.40                              | 47.23                              | 50.85                              |
| RMS <sup>§</sup> deviations                         |                                    |                                    |                                    |
| - Bond lengths (Å)                                  | 0.003                              | 0.003                              | 0.003                              |
| - Bond angles (°)                                   | 0.51                               | 0.58                               | 0.53                               |

274 # ASU = asymmetric unit.

275 § RMS = root mean square.

276 \*Highest resolution shell in parentheses.

| <b>Datasets</b>                                     | <b>Ldt<sub>Mt2</sub> – 8 (PDB: 8A1O)</b> | <b>Ldt<sub>Mt2</sub> – 13 (PDB: 8A1N)</b> | <b>Ldt<sub>Mt2</sub> – 15 (PDB: 8A1K)</b> |
|-----------------------------------------------------|------------------------------------------|-------------------------------------------|-------------------------------------------|
| <b>Data Collection</b>                              |                                          |                                           |                                           |
| Beamline (Wavelength, Å)                            | DLS I03 (0.9763)                         | DLS I03 (0.9763)                          | DLS I03 (0.9763)                          |
| Detector                                            | Eiger2 XE 16M                            | Eiger2 XE 16M                             | Eiger2 XE 16M                             |
| Data Processing                                     | Xia2 dials                               | Xia2 dials                                | Xia2 dials                                |
| Space group                                         | <i>P</i> 2 <sub>1</sub> 2 <sub>1</sub> 2 | <i>P</i> 1 2 <sub>1</sub> 1               | <i>P</i> 1 2 <sub>1</sub> 1               |
| Cell dimensions                                     |                                          |                                           |                                           |
| <i>a, b, c</i> (Å)                                  | 76.87, 93.00, 61.40                      | 60.93, 94.63, 75.36                       | 60.98, 95.17, 75.62                       |
| $\alpha, \beta, \gamma$ (°)                         | 90.00, 90.00, 90.00                      | 90.00, 92.35, 90.00                       | 90.00, 92.35, 90.00                       |
| No. of molecules/ASU                                | 1                                        | 2                                         | 2                                         |
| No. reflections                                     | 31561 (1582)*                            | 53680 (2613)*                             | 86822 (4298)*                             |
| Resolution (Å)                                      | 46.50-1.95 (1.98-1.95)*                  | 75.29-2.05 (2.08-2.05)*                   | 60.93-1.75 (1.78-1.75)*                   |
| <i>R</i> <sub>merge</sub> ( <i>I</i> )              | 0.066 (0.593)*                           | 0.090 (0.826)*                            | 0.063 (0.759)*                            |
| <i>I</i> / $\sigma$ <i>I</i>                        | 24.2 (3.5)*                              | 13.2 (1.1)*                               | 17.7 (1.0)*                               |
| CC-1/2                                              | 1.0 (0.9)*                               | 1.0 (0.8)*                                | 1.0 (0.8)*                                |
| Completeness (%)                                    | 96.2 (97.1)*                             | 99.9 (97.9)*                              | 100.0 (99.3)*                             |
| Multiplicity                                        | 12.6 (11.5)*                             | 6.8 (6.8)*                                | 6.6 (6.6)*                                |
| Wilson B value (Å <sup>2</sup> )                    | 24.43                                    | 31.68                                     | 23.14                                     |
| <b>Refinement</b>                                   |                                          |                                           |                                           |
|                                                     | PHENIX                                   | PHENIX                                    | PHENIX                                    |
| <i>R</i> <sub>work</sub> / <i>R</i> <sub>free</sub> | 0.1939/0.2228                            | 0.1954/0.2379                             | 0.1837/0.2107                             |
| No. atoms                                           | 3166                                     | 5937                                      | 6401                                      |
| - Enzyme                                            | 2696                                     | 5296                                      | 5367                                      |
| - Ligand                                            | 42                                       | 42                                        | 43                                        |
| - Water                                             | 428                                      | 599                                       | 991                                       |
| Average B-factors                                   | 37.22                                    | 44.34                                     | 34.55                                     |
| - Enzyme                                            | 35.97                                    | 44.07                                     | 32.96                                     |
| - Ligand                                            | 58.19                                    | 53.53                                     | 40.01                                     |
| - Water                                             | 43.07                                    | 46.05                                     | 42.92                                     |
| RMS <sup>§</sup> deviations                         |                                          |                                           |                                           |
| - Bond lengths (Å)                                  | 0.010                                    | 0.003                                     | 0.011                                     |
| - Bond angles (°)                                   | 0.88                                     | 0.58                                      | 0.94                                      |

278 # ASU = asymmetric unit.

279 § RMS = root mean square.

280 \*Highest resolution shell in parentheses.

281

| Datasets                                            | Ldt <sub>Mt2</sub> – 31 (PDB: 8AHO) |
|-----------------------------------------------------|-------------------------------------|
| <b>Data Collection</b>                              |                                     |
| Beamline (Wavelength, Å)                            | DLS I03 (0.9763)                    |
| Detector                                            | Eiger2 XE 16M                       |
| Data Processing                                     | Xia2 dials                          |
| Space group                                         | <i>P</i> 1 2 <sub>1</sub> 1         |
| Cell dimensions                                     |                                     |
| <i>a, b, c</i> (Å)                                  | 61.25, 94.26, 75.67                 |
| $\alpha, \beta, \gamma$ (°)                         | 90.00, 92.69, 90.00                 |
| No. of molecules/ASU                                | 2                                   |
| No. reflections                                     | 38141 (3764)*                       |
| Resolution (Å)                                      | 48.69-2.30 (2.38-2.30)*             |
| <i>R</i> <sub>merge</sub> (I)                       | 0.136 (0.781)*                      |
| <i>I</i> / $\sigma$ <i>I</i>                        | 8.9 (1.3)*                          |
| CC-1/2                                              | 1.0 (0.9)*                          |
| Completeness (%)                                    | 99.8 (98.4)*                        |
| Multiplicity                                        | 6.9 (6.8)*                          |
| Wilson B value (Å <sup>2</sup> )                    | 39.27                               |
| <b>Refinement</b>                                   | PHENIX                              |
| <i>R</i> <sub>work</sub> / <i>R</i> <sub>free</sub> | 0.2101/0.2495                       |
| No. atoms                                           | 5701                                |
| - Enzyme                                            | 5267                                |
| - Ligand                                            | 41                                  |
| - Water                                             | 393                                 |
| Average B-factors                                   | 45.27                               |
| - Enzyme                                            | 45.18                               |
| - Ligand                                            | 66.22                               |
| - Water                                             | 44.40                               |
| RMS <sup>§</sup> deviations                         |                                     |
| - Bond lengths (Å)                                  | 0.002                               |
| - Bond angles (°)                                   | 0.54                                |

282 # ASU = asymmetric unit.

283 <sup>§</sup> RMS = root mean square.

284 \*Highest resolution shell in parentheses.

285



## 286 **Experimental details for the HTS assay optimisation process**

### 287 **Optimisation of reagent concentrations and reaction volume**

288 The specified volume of assay buffer (50 mM sodium phosphate pH 7.5 with 0.01% (v/v) Triton X-100)  
289 was added to a black polystyrene, flat-bottomed, small volume, clear bottomed 384-well microplate  
290 (Greiner Bio-One, part number 784076) using a MultiDrop Combi dispenser (ThermoFisher Scientific).  
291 To this was added the specified concentrations of Ldt<sub>Mt2</sub> and probe **1**.<sup>1</sup> The fluorescence intensity was  
292 measured for the specified time using an Envision 2104 Multilabel Reader (Perkin Elmer) with  
293  $\lambda_{\text{ex}}=485$  nm,  $\lambda_{\text{em}}=540$  nm and a general dual mirror. All reactions were carried out in quadruplicate,  
294 with no-enzyme control measurements included.

### 295 **DMSO tolerance assay**

296 A Ldt<sub>Mt2</sub> stock solution of 600 nM (2x final concentration 300 nM) was prepared in the assay buffer  
297 (50 mM sodium phosphate pH 7.5 with 0.01% (v/v) Triton X-100). A solution of probe **1** (30  $\mu$ M, 2x final  
298 concentration 15  $\mu$ M) was prepared in the assay buffer. A dilution series of DMSO ranging from 33.3%  
299 to 0.003% (v/v) was added to a black polystyrene, flat-bottomed, small volume, clear bottomed 384-  
300 well microplate (Greiner Bio-One, part number 784076) using a HP D300 Digital Dispenser. To each  
301 well was added 5  $\mu$ L of the 2x Ldt<sub>Mt2</sub> stock and 5  $\mu$ L of the 2x probe **1** stock using a MultiDrop Combi  
302 dispenser (ThermoFisher Scientific). The fluorescence intensity was measured every minute for  
303 60 minutes using an Envision 2104 Multilabel Reader (Perkin Elmer) with  $\lambda_{\text{ex}}=485$  nm,  $\lambda_{\text{em}}=540$  nm and  
304 a general dual mirror. All reactions were carried out in quadruplicate, with no-enzyme control and no  
305 DMSO control measurements included.

### 306 **Detergent optimisation**

307 An Ldt<sub>Mt2</sub> stock solution of 600 nM (2x final concentration 300 nM) was prepared in the assay buffer  
308 (50 mM sodium phosphate pH 7.5). Stock solutions of 20 x critical micelle concentration (CMC) of the  
309 detergents Triton X-100, Triton X-114, Tween-20 (Thermo Scientific), Tween-80, MEGA-8, CHAPS, BRIJ-  
310 35, IPEGAL-630, n-dodecyl- $\beta$ -D-maltose, BSA and dBSA (prepared by incubation of BSA for 15 minutes  
311 at 80 °C, followed by 2 hours at room temperature and stored at -20 °C) were prepared. Using a HP  
312 D300 Digital Dispenser 11 concentrations of 1/2 step dilutions were added to a black polystyrene, flat-  
313 bottomed, small volume, clear bottomed 384-well microplate (Greiner Bio-One, part number 784076).  
314 To each well was added 5  $\mu$ L of the 2x Ldt<sub>Mt2</sub> stock and 5  $\mu$ L of the 2x probe **1** stock solution using a  
315 MultiDrop Combi dispenser (ThermoFisher Scientific). The fluorescence intensity was measured every  
316 minute for 60 minutes using an Envision 2104 Multilabel Reader (Perkin Elmer) with  $\lambda_{\text{ex}}=485$  nm,  
317  $\lambda_{\text{em}}=540$  nm and a general dual mirror. All reactions were carried out in quadruplicate, with no-enzyme  
318 control and no detergent control measurements included. Maximum tolerated concentrations were  
319 calculated by analysing the resulting slopes using Microsoft Excel. Buffers of the detergents in  
320 maximum tolerated concentrations, or 1 x CMC where no interference was observed, in 50 mM sodium  
321 phosphate pH 7.5 were prepared, omitting BRIJ-35, IPEGAL-630, BSA and dBSA due to interference at  
322 all concentrations. With each buffer, a Ldt<sub>Mt2</sub> stock of 600 nM (2x final concentration 300 nM) and a  
323 probe **1** stock solution of 30  $\mu$ M (2x final concentration 15  $\mu$ M) was prepared. To each well was added  
324 5  $\mu$ L of the 2x Ldt<sub>Mt2</sub> stock solution and 5  $\mu$ L of the 2x probe **1** stock solution using a MultiDrop Combi  
325 dispenser (ThermoFisher Scientific). The fluorescence intensity was measured every minute for 60  
326 minutes using an Envision 2104 Multilabel Reader (Perkin Elmer) with  $\lambda_{\text{ex}}=485$  nm,  $\lambda_{\text{em}}=540$  nm and a

327 general dual mirror. All reactions were carried out in quadruplicate, with no-enzyme control  
328 measurements included.

### 329 **Plate reader protocol optimisation**

330 A stock solution of Ldt<sub>Mt2</sub> of 600 nM (2x final concentration 300 nM) was prepared in the assay buffer  
331 (50 mM sodium phosphate pH 7.5 with 0.007% (v/v) Tween-20). A stock solution of probe **1** of 30 µM  
332 (2x final concentration 15 µM) was prepared in the assay buffer. To each well was added 5 µL of the  
333 2x Ldt<sub>Mt2</sub> stock solution and 5 µL of the 2x probe **1** stock solution using a MultiDrop Combi dispenser  
334 (ThermoFisher Scientific). The fluorescence intensity was measured every minute for 60 minutes using  
335 a Envision 2104 Multilabel Reader (Perkin Elmer) with λ<sub>ex</sub>=485 nm, λ<sub>em</sub>=540 nm and a FITC mirror. The  
336 plate reader protocol was optimised for the coordinates of the corners, measurement height and gain.

### 337 **Stability of stock solution concentrations**

338 A stock solution of Ldt<sub>Mt2</sub> of 600 nM (2x final concentration 300 nM) was prepared in the assay buffer  
339 (50 mM sodium phosphate pH 7.5 with 0.007% (v/v) Tween-20). A stock solution of probe **1** of 30 µM  
340 (2x final concentration 15 µM) was prepared in the assay buffer. The stock solutions were kept on ice  
341 for 7 hours, after which time 5 µL of the 2x Ldt<sub>Mt2</sub> solution and 5 µL of the 2x probe **1** solution were  
342 added to a black polystyrene, flat-bottomed, small volume, clear bottomed 384-well microplate  
343 (Greiner Bio-One, part number 784076) using a MultiDrop Combi dispenser (ThermoFisher Scientific).  
344 The fluorescence intensity was measured every minute for 60 minutes using an Envision 2104  
345 Multilabel Reader (Perkin Elmer) with λ<sub>ex</sub>=485 nm, λ<sub>em</sub>=540 nm and a FITC mirror.

### 346 **Full plate analysis**

347 A stock solution of Ldt<sub>Mt2</sub> of 600 nM (2x final concentration 300 nM) was prepared in the assay buffer  
348 (50 mM sodium phosphate pH 7.5 with 0.007% (v/v) Tween-20). A stock solution of probe **1** of 30 µM  
349 (2x final concentration 15 µM) was prepared in the assay buffer. To a black polystyrene, flat-bottomed,  
350 small volume, clear bottomed 384-well microplate (Greiner Bio-One, part number 784076) was added  
351 100 nL of DMSO to all wells using a HP D300 Digital Dispenser. To this was added 5 µL of the 2x Ldt<sub>Mt2</sub>  
352 stock solution and 5 µL of the 2x probe **1** stock solution using a MultiDrop Combi dispenser  
353 (ThermoFisher Scientific). The fluorescence intensity was measured every 5 minutes for 10 hours using  
354 a Envision 2104 Multilabel Reader (Perkin Elmer) with λ<sub>ex</sub>=485 nm, λ<sub>em</sub>=540 nm and a FITC mirror.

### 355 **Dose-response analysis with tool compounds**

356 Inhibitor solutions (in DMSO, concentrations ranging from 100 µM to 1.69 nM) were added to a black  
357 polystyrene, flat-bottomed, small volume, clear bottomed 384-well microplate (Greiner Bio-One, part  
358 number 784076), with DMSO concentrations normalised to 1% (100 nL) in each well using a Hewlett-  
359 Packard D300 Digital Dispenser.

360 The so obtained plates were stored at -20 °C until use. A stock solution of Ldt<sub>Mt2</sub> of 600 nM (2x final  
361 concentration 300 nM) was prepared in the assay buffer (50 mM sodium phosphate pH 7.5 with  
362 0.007% (v/v) Tween-20). A stock solution of probe **1** of 30 µM (2x final concentration 15 µM) was  
363 prepared in the assay buffer. To the inhibitor plates was added 5 µL of the 2x Ldt<sub>Mt2</sub> stock solution using  
364 a MultiDrop Combi dispenser (ThermoFisher Scientific). The resulting solution was incubated for 10  
365 minutes at room temperature without shaking. 5 µL of the 2x probe **1** stock solution was then added  
366 using a MultiDrop Combi dispenser (ThermoFisher Scientific). The plate was incubated for another 10

367 minutes at room temperature. The fluorescence intensity was then measured 5 minute intervals for  
368 50 minutes using an Envision 2104 Multilabel Reader (Perkin Elmer) with  $\lambda_{ex}=485$  nm,  $\lambda_{em}=540$  nm and  
369 a FITC mirror. The slope was calculated using linear regression analysis. The normalised response was  
370 calculated using the following formula: Normalized response =  $100 * ((\text{slope} - \text{slope control 2}) / (\text{slope}$   
371  $\text{control 1} - \text{slope control 2}))$ . The dose-response analysis was performed in Prism (GraphPad), using the  
372 log(inhibitor) versus normalized response- variable slope function.

373

374 **References**

- 375 1. de Munnik, M.; Lohans, C. T.; Langley, G. W.; Bon, C.; Brem, J.; Schofield, C. J., A Fluorescence-  
376 Based Assay for Screening  $\beta$ -Lactams Targeting the Mycobacterium tuberculosis Transpeptidase  
377 LdtMt2. *ChemBioChem* **2020**, *21*, 368-372.
- 378 2. Van Berkel, S. S.; Brem, J.; Rydzik, A. M.; Salimraj, R.; Cain, R.; Verma, A.; Owens, R. J.;  
379 Fishwick, C. W. G.; Spencer, J.; Schofield, C. J., Assay Platform for Clinically Relevant Metallo- $\beta$ -  
380 lactamases. *J. Med. Chem.* **2013**, *56*, 6945-6953.
- 381 3. de Munnik, M.; Lohans, C. T.; Lang, P. A.; Langley, G. W.; Malla, T. R.; Tumber, A.; Schofield,  
382 C. J.; Brem, J., Targeting the Mycobacterium tuberculosis transpeptidase LdtMt2 with cysteine-reactive  
383 inhibitors including ebselen. *Chem. Commun.* **2019**, *55*, 10214-10217.
- 384 4. Schörghener, J.; Waser, M., New strategies and applications using electrophilic cyanide-  
385 transfer reagents under transition metal-free conditions. *Org. Chem. Front.* **2016**, *3* (11), 1535-1540.
- 386 5. Charpentier, J.; Früh, N.; Togni, A., Electrophilic Trifluoromethylation by Use of Hypervalent  
387 Iodine Reagents. *Chem. Rev.* **2015**, *115* (2), 650-682.
- 388 6. Sameshima, T.; Miyahisa, I.; Yamasaki, S.; Gotou, M.; Kobayashi, T.; Sakamoto, J., High-  
389 Throughput Quantitative Intrinsic Thiol Reactivity Evaluation Using a Fluorescence-Based Competitive  
390 Endpoint Assay. *Adv. Sci. Drug Disc.* **2017**, *22*, 1168-1174.

391
